# Supplementary material for: High Reactivity of Dimethyl Ether Activated by Zeolite Ferrierite within a Fer Cage: A Prediction Study
Source: MDPI journal article supplement (doi:10.3390/molecules29092000), 2024-04-26
Supplement: s1 [file s1]

# High Reactivity of Dimethyl Ether Activated by Zeolite Ferrierite within a Fer Cage: A Prediction Study

Xiaofang Chen <sup>1,2,\*</sup>, Pei Feng <sup>2</sup> and Xiujie Li <sup>3,\*</sup>

<sup>1</sup> Institute of Frontier Chemistry, School of Chemistry and Chemical Engineering, Shandong University, Qingdao 266237, China

<sup>2</sup> State Key Laboratory of Molecular Reaction Dynamics, Dalian Institute of Chemical Physics, Chinese Academy of Sciences, Dalian 116023, China; fengpei@stdu.edu.cn

<sup>3</sup> State Key Laboratory of Catalysis, Dalian Institute of Chemical Physics, Chinese Academy of Sciences, Dalian 116023, China

\* Correspondence: xf.chen@sdu.edu.cn or chen\_smiling@163.com (X.C.); xiujieli@dicp.ac.cn (X.L.)

## Content

|                                                                                                                                                                  |   |
|------------------------------------------------------------------------------------------------------------------------------------------------------------------|---|
| Figure.S1 The pore sizes of (a) 8- and (b) 10-member channels of zeolite ferrierite, and (c) the molecule size of dimethyl ether (DME).....                      | 2 |
| Figure.S2 Total energy of zeolite ferrierite dependant on the energy cutoff.....                                                                                 | 3 |
| Figure.S3 Total energy of zeolite ferrierite dependant on the unit cell volume.....                                                                              | 4 |
| Figure.S4 Schematic structures of reactants (Rex), transition states (TSx), and products (Px) from Eq.x (x = 1-6). For Eq.x, please refer to the section 1. .... | 5 |
| Table S1 The energy difference (in kcal/mol) between two types of K-meshes (i.e., 1×1×1 and 2×2×2) of H-FER. ....                                                | 7 |
| Table S2. The fractional coordinates for Rex, TSx, and Px from Eq.x (x = 1-6).....                                                                               | 8 |

Figure S1. The pore sizes of (a) 8- and (b) 10-member channels of zeolite ferrierite, and (c) the molecule size of dimethyl ether (DME).

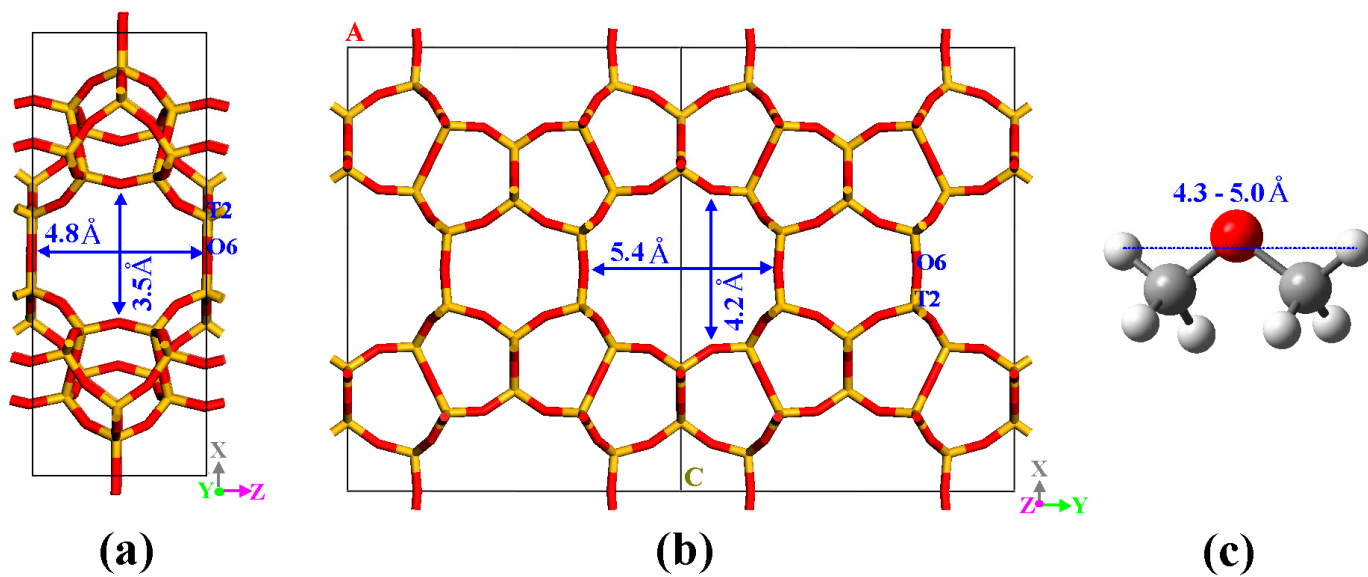

Figure S2. Total energy of zeolite ferrierite dependant on the energy cutoff

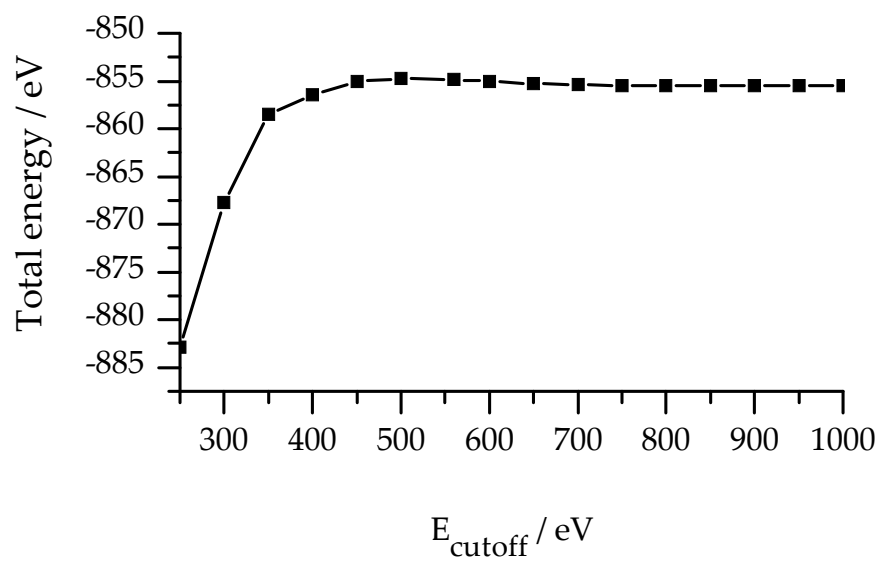

Figure S3. Total energy of zeolite ferrierite dependant on the unit cell volume.

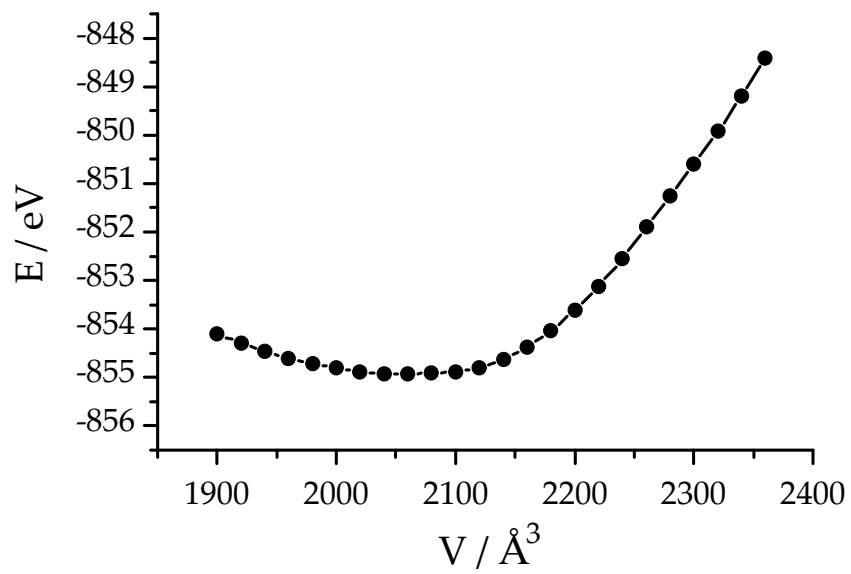

Figure S4. Schematic structures of reactants (Rex), transition states (TSx), and products (Px) from Eq.x ( $x = 1-6$ ). For Eq.x, please refer to the section 1.

Noting that (1) O in red, Si in yellow, Al in pink, C in grey, and H in white; (2) the detailed coordinates are provided in following S3 in this Supplementary Materials.

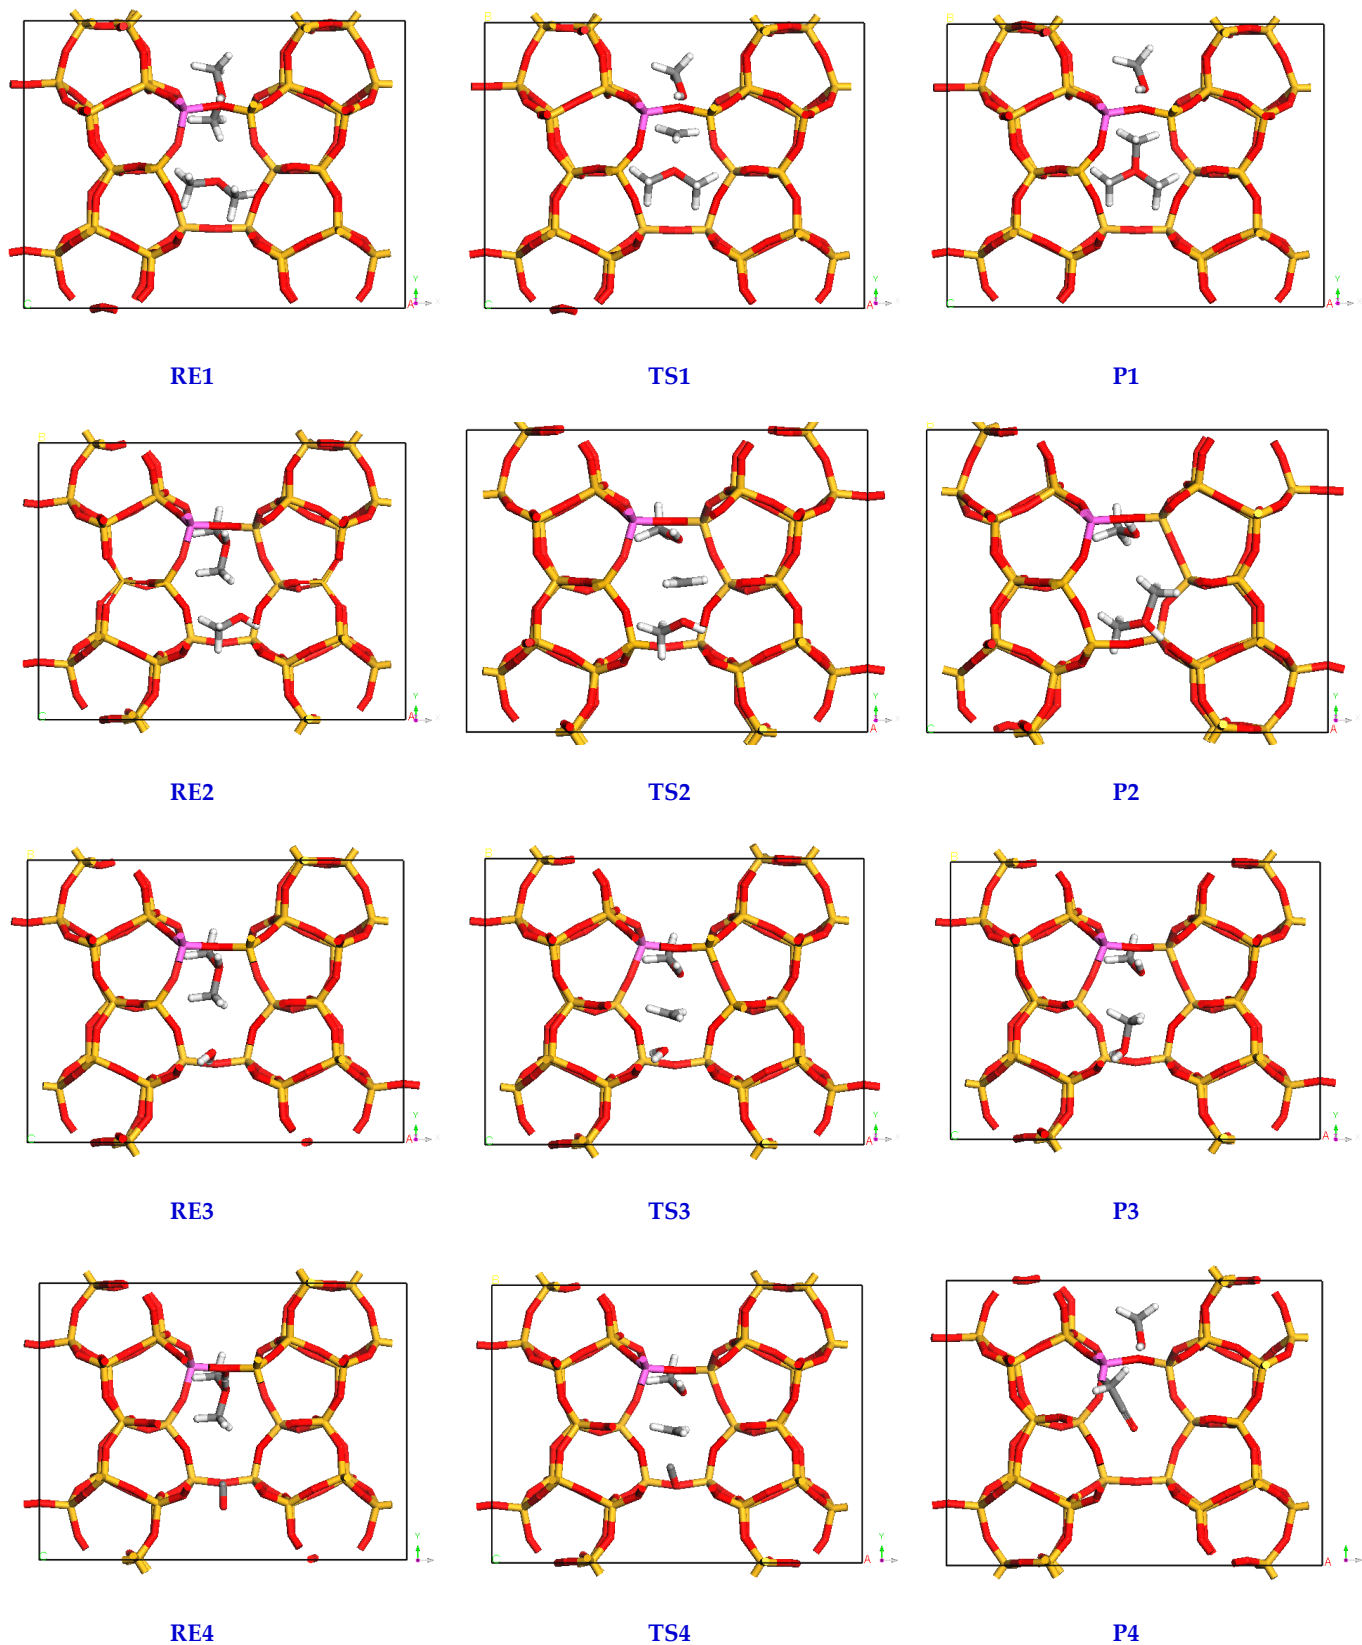

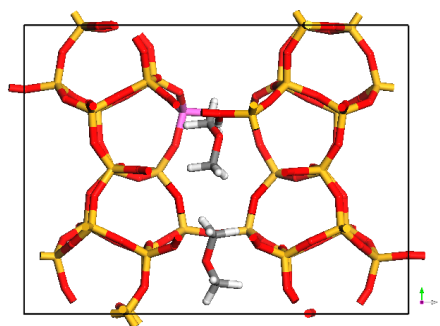

RE5

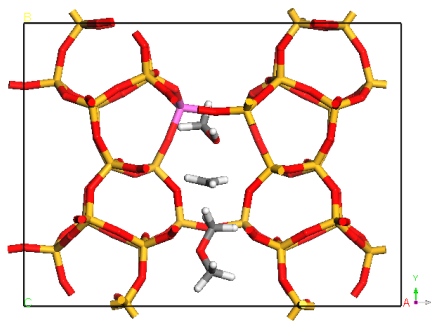

TS5

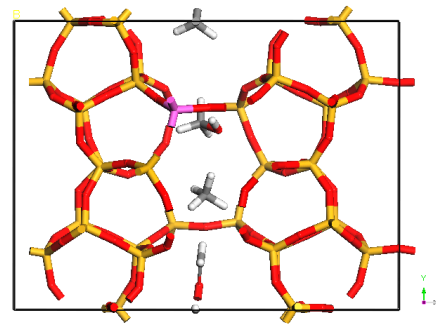

P5

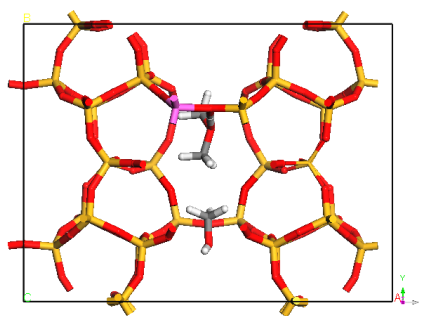

RE6

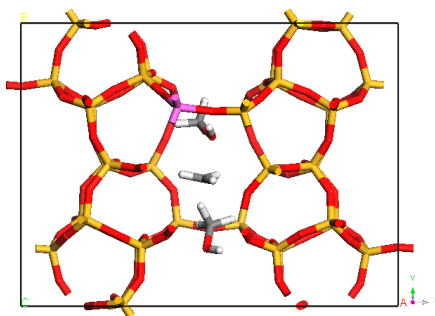

TS6

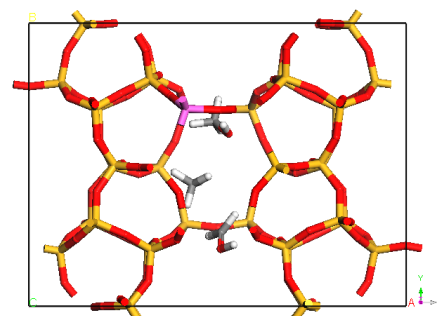

P6

Table S1. The energy difference (in kcal/mol) between two types of K-meshes (i.e., 1×1×1 and 2×2×2) of H-FER.

| item | in kcal/mol                  |                              |                                                           |                |                |                               |
|------|------------------------------|------------------------------|-----------------------------------------------------------|----------------|----------------|-------------------------------|
|      | $\Delta E^\ddagger(1^*1^*1)$ | $\Delta E^\ddagger(2^*2^*2)$ | $\Delta E^\ddagger(2^*2^*2) - \Delta E^\ddagger(1^*1^*1)$ | $E_r(1^*1^*1)$ | $E_r(2^*2^*2)$ | $E_r(2^*2^*2) - E_r(1^*1^*1)$ |
| Eq.1 | 18.47                        | 17.70                        | -0.77                                                     | 9.39           | 7.61           | -1.78                         |
| Eq.2 | 22.13                        | 22.97                        | 0.84                                                      | 14.78          | 15.79          | 1.01                          |
| Eq.3 | 23.49                        | 22.97                        | -0.52                                                     | 17.67          | 16.75          | -0.92                         |
| Eq.4 | 30.06                        | 29.47                        | -0.59                                                     | -8.37          | -7.85          | 0.52                          |
| Eq.5 | 34.00                        | 34.21                        | 0.21                                                      | 26.41          | 26.27          | -0.14                         |
| Eq.6 | 36.63                        | 36.65                        | 0.02                                                      | 18.43          | 16.75          | -1.68                         |

Noting that 1)  $\Delta E^\ddagger(1^*1^*1)$  or  $\Delta E^\ddagger(2^*2^*2)$  represents the activation internal barrier when K-mesh is 1×1×1 or 2×2×2; 2)  $E_r(1^*1^*1)$  or  $E_r(2^*2^*2)$  represents the reaction heat when K-mesh is 1×1×1 or 2×2×2.

Table S2. The fractional coordinates for Rex, TSx, and Px from Eq.x (x = 1-6).

Re1(H13C4O74Al1Si35):

|                    |                     |                    |
|--------------------|---------------------|--------------------|
| 0.5138429324990170 | 0.7288688809139430  | 0.7558005565670385 |
| 0.5093438279171778 | 0.8321353742116884  | 0.3968493583751567 |
| 0.5361824539989186 | 0.8822565488952208  | 0.6060155747878468 |
| 0.4457364644550381 | 0.8482580277826841  | 0.5709184239321203 |
| 0.5177085226575642 | 0.6647771467005725  | 0.3731287739090305 |
| 0.4371397386944409 | 0.6599489872256967  | 0.4997984813923182 |
| 0.5148787259904992 | 0.5984665060213246  | 0.5742139802721340 |
| 0.5734255452100996 | 0.3417491334143037  | 0.5140207032454072 |
| 0.5673661835847383 | 0.4452507383875570  | 0.6460685600310825 |
| 0.6152851208281973 | 0.4473675685340766  | 0.4411676811772125 |
| 0.4008906723518137 | 0.4376908110712776  | 0.4164635869848325 |
| 0.4454032934098251 | 0.3362893910553524  | 0.5010115932988342 |
| 0.4416732452327494 | 0.4408302767629237  | 0.6315530748167149 |
| 0.5008108431826059 | 0.8324805616095645  | 0.5403797784315856 |
| 0.4947205665952339 | 0.65999273062217361 | 0.5054141462851973 |
| 0.5690518863600218 | 0.4185756335664621  | 0.5083034235325457 |
| 0.4458908050678545 | 0.4133023572402834  | 0.4949809991749134 |
| 0.3307456882333426 | 0.0648518279204922  | 0.7683680602016452 |
| 0.4037436349709722 | 0.2185575452770649  | 0.8195945858041398 |
| 0.8295195595104872 | 0.5724492240946546  | 0.2509557086213832 |
| 0.8790652600725863 | 0.7404984646701612  | 0.3292598594202119 |
| 0.6953601188261160 | 0.8879667897153496  | 0.7156106849075314 |
| 0.6452219736634461 | 0.7261922205622611  | 0.8284286991951006 |
| 0.1851938302203635 | 0.3943075509853671  | 0.2278634708495346 |
| 0.1185230823992427 | 0.2397512736873253  | 0.3241106994712126 |
| 0.6905219499373203 | 0.0692811771367801  | 0.2296633101231791 |
| 0.6252663323435517 | 0.2602813279829081  | 0.1704272303372321 |
| 0.1737437196824345 | 0.5647935328956564  | 0.7287025188174425 |
| 0.1042350172331368 | 0.7216307741021240  | 0.6650238371197474 |
| 0.3239158749105613 | 0.8915417649700359  | 0.2549154505735771 |
| 0.4016045920326405 | 0.7424114592152975  | 0.1781093084127079 |
| 0.8269834742426099 | 0.3870399185307605  | 0.7639544441446873 |
| 0.8847472518149715 | 0.2252334487884085  | 0.6740015588578174 |
| 0.6871223076416797 | 0.8863291872809285  | 0.2542564805866405 |
| 0.6131619316337691 | 0.7335880790393006  | 0.1743415492369706 |
| 0.1871557701288040 | 0.3833403251437346  | 0.7592770025678703 |
| 0.1293591548307162 | 0.2205158542662460  | 0.6778903605389104 |
| 0.3173673595460968 | 0.0735552046837142  | 0.2243540671075337 |
| 0.3907542216104929 | 0.2274856150297424  | 0.1743882370016152 |
| 0.8385473705655500 | 0.5695527706429502  | 0.7361490409898721 |
| 0.9136925468081714 | 0.7229187946983373  | 0.6723550945430574 |
| 0.3124696484383236 | 0.8861250379680357  | 0.7078898524231079 |
| 0.3805117825797737 | 0.7317989676642753  | 0.7978163563675764 |
| 0.8261682489634268 | 0.3897253606976179  | 0.2318428387145985 |
| 0.8964864741899774 | 0.2369049935379692  | 0.3195092817096992 |
| 0.6843226018315249 | 0.0689015271476094  | 0.7701818572947587 |
| 0.6115379340553773 | 0.2242431344620286  | 0.8176071376290395 |
| 0.1891618494760792 | 0.5768596093314855  | 0.2587612644848321 |
| 0.1356246197643713 | 0.7438000710977377  | 0.3198892205396078 |
| 0.3577495980727861 | 0.1774548549610699  | 0.4986632504126973 |
| 0.1013402235554111 | 0.0728794764487191  | 0.4741399371764459 |
| 0.8632397240373422 | 0.6909858803372089  | 0.9938839021659334 |
| 0.6080812398952560 | 0.5713598650638332  | 0.9972430679483750 |
| 0.6762482347057528 | 0.7491455027237492  | 0.4876714265062532 |
| 0.9037077170045578 | 0.8906399670292018  | 0.5216841090307014 |
| 0.1734668579648826 | 0.2514834984772207  | 0.0038017036951530 |
| 0.3900083408085493 | 0.3816016705710297  | 0.9790378166296492 |
| 0.6549100459699702 | 0.1787106405203289  | 0.4972506041756048 |
| 0.9089749259061009 | 0.0732066839889853  | 0.4812759690757105 |
| 0.1470235357985672 | 0.6832123077936672  | 0.9905267051228392 |
| 0.4097508205082576 | 0.5645312724276081  | 0.9953525362303282 |
| 0.3276904824262843 | 0.7489081435901994  | 0.4768655336201988 |
| 0.1106104716567771 | 0.8910590885800076  | 0.5216898897269644 |
| 0.8395257245842487 | 0.2511473570629192  | 0.0006647507312252 |
| 0.6204639716288227 | 0.3871135792964751  | 0.9824217869254710 |
| 0.2668013611817628 | 0.2311214418006458  | 0.7466366370991651 |
| 0.7778203434406947 | 0.7378106967042797  | 0.7269316140707573 |

|                    |                     |                    |
|--------------------|---------------------|--------------------|
| 0.7580781952270286 | 0.2299517693962372  | 0.2844921670455420 |
| 0.2614679312011603 | 0.7302758479111020  | 0.1689245438397080 |
| 0.7514526912126129 | 0.7234546824360706  | 0.1910009231855980 |
| 0.2574675153787922 | 0.2387263099342505  | 0.2864315303735054 |
| 0.2402937437497101 | 0.7290372463967003  | 0.7437785943376412 |
| 0.7474532159411069 | 0.2353724148949681  | 0.7387639640455816 |
| 0.0069315004929180 | 0.2047918814216771  | 0.5192954602457505 |
| 0.5142707163733746 | 0.7056259464226002  | 0.9233250332107374 |
| 0.0078043157777614 | 0.7756944666314070  | 0.4352898737776059 |
| 0.5067881570172617 | 0.2821475689331550  | 0.0186996833001061 |
| 0.2051280303230030 | 0.0044582668107580  | 0.6655127094733473 |
| 0.7073991183039468 | 0.4865202208791288  | 0.1825595160941162 |
| 0.8080109793280812 | 0.9983542724494896  | 0.6737658918027662 |
| 0.3078148419366116 | 0.4837236094358559  | 0.1827942018614550 |
| 0.8078188068234695 | 0.9760768013028169  | 0.3213503199893424 |
| 0.2975224976742865 | 0.4940264768964013  | 0.8258053753699151 |
| 0.2014784563929766 | 0.9782951963332849  | 0.3118120481854589 |
| 0.7151206186728842 | 0.4955218086277995  | 0.8271778115971458 |
| 0.2510978796036341 | 0.9666160050414092  | 0.9882319636684755 |
| 0.7620197055951223 | 0.4759503441954251  | 0.5005421491584769 |
| 0.7593031050422141 | 0.96555710507536521 | 0.9444551251563425 |
| 0.2536246164650464 | 0.4716251041172939  | 0.5002176797625779 |
| 0.5198861952195273 | 0.7405407497975247  | 0.6069443970116168 |
| 0.5083051291706724 | 0.4465628675052145  | 0.4114772801707289 |
| 0.4218519960806049 | 0.6840806671321786  | 0.9821131882839325 |
| 0.3387802401374245 | 0.1732296216580878  | 0.7082072181798083 |
| 0.8314490266373795 | 0.6816498809612739  | 0.1922374077520672 |
| 0.6987190855943624 | 0.7749992220734825  | 0.6907277622893560 |
| 0.1837755092266420 | 0.2811532083448043  | 0.2100698359087687 |
| 0.6823328850318404 | 0.1773282940189560  | 0.2937765306269142 |
| 0.1672146963687595 | 0.6746644865174645  | 0.7818630742406043 |
| 0.3298668159294493 | 0.7776115760307292  | 0.2681074191810850 |
| 0.8249278192400666 | 0.2744909530111315  | 0.7932658275756310 |
| 0.6829157693255326 | 0.7735492628839822  | 0.2778837772640657 |
| 0.1894068916579599 | 0.2717840281421289  | 0.7959636657780180 |
| 0.3303696676773527 | 0.1792708229265969  | 0.2945207903932356 |
| 0.8482506547273871 | 0.6797575953122674  | 0.7830424742845992 |
| 0.3158671670214659 | 0.7724011086292748  | 0.6863085607297208 |
| 0.8299843035444141 | 0.2768839861629431  | 0.2086271307839098 |
| 0.6751714767627917 | 0.1769347740136098  | 0.7064612927788474 |
| 0.1837966458425200 | 0.6833824506871480  | 0.1855030575354277 |
| 0.0903528677714860 | 0.1846766469917753  | 0.4985126659624655 |
| 0.5957399603924571 | 0.6833925685933337  | 0.9836079962808810 |
| 0.9262321125850335 | 0.7824061031351235  | 0.4905602283070465 |
| 0.4219610457533705 | 0.2780922523584195  | 0.9985603915136352 |
| 0.9239631415959551 | 0.1847688126958360  | 0.4986936730928377 |
| 0.0907425838936717 | 0.7823989450456672  | 0.4861636647723600 |
| 0.5907874922433720 | 0.2810061665705987  | 0.9978573339006616 |
| 0.2746580514818078 | 0.9792351655023452  | 0.7829872777419595 |
| 0.7815209392756586 | 0.4810526025340920  | 0.2913691496973030 |
| 0.7371625193023377 | 0.9801292766183778  | 0.7881993439464310 |
| 0.2342258469894531 | 0.4819937801385237  | 0.2912283448115858 |
| 0.7366505786485646 | 0.9750147224499344  | 0.2011996576382060 |
| 0.2287032125226034 | 0.4785212805186561  | 0.7057525024143203 |
| 0.2734448459355860 | 0.9772865507041573  | 0.1955400568238161 |
| 0.7855908421954325 | 0.4816668845304193  | 0.7076722412174874 |
| 0.1555125237495574 | 0.9858072308738315  | 0.4926373528969705 |
| 0.6630706195653104 | 0.4842745780611324  | 0.9972247478812619 |
| 0.8570083652668217 | 0.9841945801134457  | 0.4986862992345209 |
| 0.3523492279807456 | 0.4832000495197377  | 0.9968658845677396 |

Re2 (H11C3O74Al1Si35)

|                    |                    |                    |
|--------------------|--------------------|--------------------|
| 0.5053514223413984 | 0.6683385203704901 | 0.7757797671973847 |
| 0.5065697723019653 | 0.6429520320117916 | 0.3687736370235086 |
| 0.5032944838356741 | 0.7503909605375370 | 0.4922974829453395 |
| 0.4268673618820316 | 0.6764087781447330 | 0.4827661262672223 |
| 0.4291324918598463 | 0.5311936640027426 | 0.6333696636755946 |
| 0.5000014624374316 | 0.5096482054869469 | 0.7868294301851151 |





|                     |                    |                     |                    |                    |                     |
|---------------------|--------------------|---------------------|--------------------|--------------------|---------------------|
| 0.1032914287735736  | 0.7344879583558708 | 0.6667594482468289  | 0.3143264251312488 | 0.2058654181537136 | 0.3040381613360736  |
| 0.3186789286891809  | 0.9160457963923818 | 0.2108539760090338  | 0.8313845751939226 | 0.6968456682850857 | 0.7847540108772293  |
| 0.4000353826057221  | 0.7656325458901918 | 0.1834242020243693  | 0.3183567894281580 | 0.8015207257846626 | 0.6955622657390848  |
| 0.8190577190762625  | 0.4011457093866397 | 0.7423974405562959  | 0.8324512063192415 | 0.2973322297169645 | 0.2201227446979743  |
| 0.8752695381048383  | 0.2351578868513755 | 0.6819094695126182  | 0.6733138339622187 | 0.1956432252415539 | 0.7240470054585657  |
| 0.6732515563776786  | 0.9085629880090735 | 0.2494760940171048  | 0.1832609063263604 | 0.7062312369907886 | 0.1911988511559954  |
| 0.5999730234231819  | 0.7544502423071506 | 0.1759790174997420  | 0.0830107616323374 | 0.1959395755853990 | 0.5031410687597386  |
| 0.1802495589469260  | 0.4044246627071431 | 0.7376990751640733  | 0.5885318825557562 | 0.6928800736732796 | 0.9962170604048666  |
| 0.1272035453773555  | 0.2368621039530439 | 0.6702768584048542  | 0.9172289354156291 | 0.7903504878798628 | 0.4942550345394849  |
| 0.3041149724894581  | 0.0942729508172704 | 0.2822256291211502  | 0.4151937798545831 | 0.2912652272642973 | 0.0075043746074570  |
| 0.3758048965046115  | 0.2422617306732917 | 0.1737638291760462  | 0.9172440718040065 | 0.1933886999694181 | 0.5123614472493969  |
| 0.8253638125408429  | 0.5839706569922356 | 0.7646955920134104  | 0.0828492112031185 | 0.7927113152050751 | 0.4884985063399725  |
| 0.8996016932442927  | 0.7351098682626613 | 0.6784221862305699  | 0.5825334398602635 | 0.2923746775976426 | 0.0116048512086024  |
| 0.3106567192930925  | 0.9066739382433866 | 0.7782518247977848  | 0.2681046223708137 | 0.0038919562274131 | 0.7922238548993334  |
| 0.3752360599610967  | 0.7424231614365340 | 0.8037443446569057  | 0.7756140513563921 | 0.4940799749640874 | 0.2966481795019362  |
| 0.8300532405186232  | 0.4072594445258417 | 0.2759755980388121  | 0.7301745213824091 | 0.9954399119901112 | 0.8008093500788718  |
| 0.8946521173737239  | 0.2462620919596361 | 0.3300596709809724  | 0.2205250350931180 | 0.4981511059879580 | 0.2859684367563844  |
| 0.6798982362108461  | 0.0831765036389882 | 0.7489514863611717  | 0.7259037806562390 | 0.9965728410890335 | 0.51265140314109948 |
| 0.6068426134252931  | 0.2334857010418574 | 0.8375678851006754  | 0.2270566815236563 | 0.4978039323681926 | 0.7009693904516539  |
| 0.1817705848030613  | 0.5943458500182430 | 0.2284248182929431  | 0.2646420465119590 | 0.0028679184325853 | 0.2003739220459337  |
| 0.1252897621364539  | 0.7564037911306372 | 0.3160495018002365  | 0.7750539153654969 | 0.4967178586197107 | 0.7099170367369751  |
| 0.3399638233607973  | 0.2282034968740092 | 0.5066613023830868  | 0.1479540728487478 | 0.9935287585003110 | 0.4937974120967681  |
| 0.0986639051804445  | 0.0855372111098092 | 0.4783229544120928  | 0.6561625231021679 | 0.4894624291171869 | 0.0059795043443032  |
| 0.8379737350909409  | 0.7230810465613970 | 0.9935105643694939  | 0.8489781002555574 | 0.9924124343189078 | 0.5090882349921912  |
| 0.6117562044761513  | 0.5852448661321006 | 0.0323438700217977  | 0.3437738506557722 | 0.4916217944274095 | 0.0005360746564946  |
| 0.6505287906493606  | 0.7819665012477941 | 0.4984890405011555  |                    |                    |                     |
| 0.8978353140703632  | 0.9002173018746120 | 0.5159718820917831  | Re4(H7C3O74Al1Si:  |                    |                     |
| 0.1501345024231995  | 0.2885779264522554 | 0.0015177827723747  | 0.5043977903800752 | 0.6544902803295187 | 0.7971678829665763  |
| 0.3952315799992405  | 0.4004030302117059 | 0.9938270409946099  | 0.5080602062028703 | 0.6289196835024455 | 0.3737668731567183  |
| 0.6619914698435423  | 0.2186956966902542 | 0.5152150691291695  | 0.5000513891014506 | 0.7328863940801398 | 0.5059350828882145  |
| 0.8995221620137102  | 0.0828690821179023 | 0.492652233253303   | 0.4260185219573529 | 0.6559300027283470 | 0.4820817021508574  |
| 0.1618572716219191  | 0.7259655213133840 | 0.9857514415933935  | 0.4295996901107912 | 0.5074908717880717 | 0.6293971738324871  |
| 0.3904340037336667  | 0.5827899450309886 | 0.0279878587316773  | 0.5140671820597333 | 0.4767039358331999 | 0.5382573541921261  |
| 0.3426964640261048  | 0.8109316245945521 | 0.4903765632779340  | 0.5028217902913283 | 0.4837832027835773 | 0.7745154504263283  |
| 0.0973865754419947  | 0.9035026951432172 | 0.5183096925589012  | 0.4835344713028888 | 0.6601958979112155 | 0.4913481867335250  |
| 0.8493833834422020  | 0.2882348230804084 | 0.0104949973711754  | 0.4869903976155499 | 0.5130498320523813 | 0.6465875302357489  |
| 0.6019065350369743  | 0.4025654449744351 | 0.9864025841884327  | 0.4994375196854364 | 0.2630055679505432 | 0.4977816107814093  |
| 0.2577639802213767  | 0.2521565531133447 | 0.7921582429607952  | 0.5004896914091717 | 0.1836196611177385 | 0.4829462574114487  |
| 0.7620422443605435  | 0.7464193862995927 | 0.6971135212367301  | 0.5082125046213761 | 0.6102492560917980 | 0.6464911442756289  |
| 0.7572731698332902  | 0.2482870547709339 | 0.2651958716238028  | 0.3137361317779792 | 0.0904691973948104 | 0.7327109842837771  |
| 0.2614990769930827  | 0.7464574685614522 | 0.2293448646514094  | 0.3934018861486663 | 0.2330717695346394 | 0.8343338025681177  |
| 0.7376516047864641  | 0.7431232605722897 | 0.2305460836314026  | 0.8160614939776707 | 0.5896282193551627 | 0.2233937282245435  |
| 0.2405925620557881  | 0.2592191005030386 | 0.26685916480151661 | 0.8726239832667773 | 0.7498174701869047 | 0.3282762463225311  |
| 0.2406407414035741  | 0.7518344500931136 | 0.6959421437338449  | 0.6854343466970434 | 0.9056879397871711 | 0.7530460831786954  |
| 0.7437904235661534  | 0.2473777993589792 | 0.7979347802476298  | 0.6335370127364328 | 0.7389380746458940 | 0.8303011278738097  |
| 0.0001439671829715  | 0.2094023482255096 | 0.5452536925867406  | 0.1675091146380225 | 0.4153338207667403 | 0.2726870101731009  |
| 0.5060043874021929  | 0.6925895735739402 | 0.9315384414451344  | 0.1029724873104882 | 0.2544184896666906 | 0.3279311828359184  |
| 0.9994806383888317  | 0.7778899909408281 | 0.4504213773673911  | 0.6859910198358605 | 0.0920628268395021 | 0.2695530835516493  |
| 0.4991778855963460  | 0.2804892354694815 | 0.0392602507869810  | 0.6249171569775811 | 0.2520296021999329 | 0.1802630790709827  |
| 0.1985620289262755  | 0.0041068361577317 | 0.6664372658982813  | 0.1778099454073327 | 0.5899375321812457 | 0.7617063438669689  |
| 0.7049447655617627  | 0.4726274626504008 | 0.1805460040822311  | 0.1033581182717356 | 0.7403764239982351 | 0.6749164816163997  |
| 0.8035713013252419  | 0.9997952961858942 | 0.6914811403537513  | 0.3253897910564092 | 0.9186519228812600 | 0.2194077086294541  |
| 0.2884485248984348  | 0.4761669252863854 | 0.1632533933864551  | 0.4029902428334822 | 0.7648263088091838 | 0.1918028952164619  |
| 0.7962106321318174  | 0.9866766066410264 | 0.3382511166461342  | 0.8217653407991037 | 0.4048864576266240 | 0.7391592170350165  |
| 0.3007340456641501  | 0.4943550205543232 | 0.8111372957994121  | 0.8747060893665974 | 0.2372891086431395 | 0.6737482516549562  |
| 0.1303365411901704  | 0.9814100233462426 | 0.3125020722414220  | 0.6746540188697310 | 0.9096868355496071 | 0.2402385053554994  |
| 0.7031311179552020  | 0.4976139162751352 | 0.8267285894146497  | 0.6003114259336115 | 0.7557692687310791 | 0.1744241309646881  |
| 0.2427636587465543  | 0.0225870576875096 | 0.9951741612793654  | 0.1789899357026243 | 0.4070452994485976 | 0.7370721631599721  |
| 0.7525354351008815  | 0.5057948347388148 | 0.5025678370145314  | 0.1275351527129089 | 0.2377116964185433 | 0.6772228656420083  |
| 0.7496775526976478  | 0.9984812160357706 | 0.0102758999695425  | 0.3106077085869430 | 0.0974507827333042 | 0.2848146854736413  |
| 0.24628446627631805 | 0.5042797966642993 | 0.4915696623434584  | 0.3785408146005622 | 0.2503505843990581 | 0.1887284461179490  |
| 0.4131192893910836  | 0.6984835911311933 | 0.9951786180066833  | 0.8229575586855660 | 0.5879050513708464 | 0.7625695881475920  |
| 0.3273284896461348  | 0.2006456261001688 | 0.7138345477661829  | 0.8992932979428332 | 0.7371382831766269 | 0.6769518892669097  |
| 0.8159463575987473  | 0.7005160461329965 | 0.1968151438463011  | 0.3104510566271301 | 0.9086258586381817 | 0.7819892328631681  |
| 0.6835827630362488  | 0.7913745135159331 | 0.6971694394488992  | 0.3748382868864866 | 0.7444223728693018 | 0.8137826583994467  |
| 0.1644188570359049  | 0.3030101650622186 | 0.2120392048515285  | 0.8324535740045675 | 0.4085116745086310 | 0.2724757712582928  |
| 0.6811774635225376  | 0.2025523414166841 | 0.3077735855013586  | 0.8991065397957598 | 0.2487250830095249 | 0.3246208553047651  |
| 0.1722653084164136  | 0.6998789084006347 | 0.7780230077245493  | 0.6821176119467367 | 0.0887930309949494 | 0.7438074889238635  |
| 0.3315233410031979  | 0.8088055796373439 | 0.2770409064607051  | 0.6076597657465257 | 0.2397122530508753 | 0.8265757524963107  |
| 0.8221667451006880  | 0.2929324029042917 | 0.8069249045692359  | 0.1891228192684480 | 0.5949846225007747 | 0.2255923502039465  |
| 0.6662928105612522  | 0.7974313053539888 | 0.2888254669577250  | 0.1277514382643190 | 0.7521638581170862 | 0.3245395251040648  |
| 0.1786729133784419  | 0.2959421504663950 | 0.7996167488698944  | 0.3324066928234544 | 0.2337651747007286 | 0.5164542646776198  |

|                    |                     |                    |                    |                    |                    |
|--------------------|---------------------|--------------------|--------------------|--------------------|--------------------|
| 0.1026502587985121 | 0.0876588678489512  | 0.4791017716897272 | 0.6575801201987517 | 0.4900632906253932 | 0.0018487151468776 |
| 0.8375841317744204 | 0.7261292859767323  | 0.9921980987741179 | 0.8501479555900104 | 0.9929074323527018 | 0.5041919913548725 |
| 0.6151833668592133 | 0.5875560910391968  | 0.0282272741112095 | 0.3453658958170323 | 0.4911555555176861 | 0.0070059610873727 |
| 0.6505910660351120 | 0.7869663525005279  | 0.4962384011460372 |                    |                    |                    |
| 0.9005657932516513 | 0.9021453180407164  | 0.5146296594832549 |                    |                    |                    |
| 0.1458313915741556 | 0.2963949396757499  | 0.0064414664799344 |                    |                    |                    |
| 0.3973009399210952 | 0.4007851066235091  | 0.9874579063915832 |                    |                    |                    |
| 0.6679337871327391 | 0.2255402084363922  | 0.5098461405256032 |                    |                    |                    |
| 0.8990405178527610 | 0.0847648663573537  | 0.4858976989477881 |                    |                    |                    |
| 0.1636457686446207 | 0.7285144112439923  | 0.9913746180699334 |                    |                    |                    |
| 0.3922802836885495 | 0.5824163075034150  | 0.0324529946033465 |                    |                    |                    |
| 0.3451833928696004 | 0.8109032251689001  | 0.4978842383997275 |                    |                    |                    |
| 0.0966304978770935 | 0.9051483850269122  | 0.5082486123031700 |                    |                    |                    |
| 0.8542424827055726 | 0.2915075654535784  | 0.0046964307402817 |                    |                    |                    |
| 0.6012921689498043 | 0.4051342743674695  | 0.9884310971934056 |                    |                    |                    |
| 0.2564014191734714 | 0.2565189256932641  | 0.8100402806794662 |                    |                    |                    |
| 0.7618712900751206 | 0.7521716392117881  | 0.6967663205459615 |                    |                    |                    |
| 0.7618217866888912 | 0.2476364414662982  | 0.2557429693712407 |                    |                    |                    |
| 0.2636833406371792 | 0.7518437468814838  | 0.2325592033069626 |                    |                    |                    |
| 0.7376511953024334 | 0.7427291805500644  | 0.2315993289129779 |                    |                    |                    |
| 0.2404252233258077 | 0.2567623391409484  | 0.2563628128238804 |                    |                    |                    |
| 0.2412620289916703 | 0.7530451772087190  | 0.6988775579362851 |                    |                    |                    |
| 0.745186995502136  | 0.2528900252039250  | 0.8013543810950736 |                    |                    |                    |
| 0.0012226523493766 | 0.2074650087475263  | 0.5487227173615992 |                    |                    |                    |
| 0.5068111031358598 | 0.6909960257145400  | 0.9323903203435151 |                    |                    |                    |
| 0.0004554648574810 | 0.7765481041847409  | 0.4501484820299808 |                    |                    |                    |
| 0.5006070517038381 | 0.2801871231329969  | 0.0361839417266552 |                    |                    |                    |
| 0.1927708370520946 | 0.9994071773347031  | 0.6882877869637269 |                    |                    |                    |
| 0.7076547618539806 | 0.4731952421239285  | 0.1739353883863330 |                    |                    |                    |
| 0.8038150052386399 | 0.0004053914651294  | 0.6852281866297716 |                    |                    |                    |
| 0.2945474869074545 | 0.4729085474233372  | 0.1780742658713521 |                    |                    |                    |
| 0.7983688098954360 | 0.9836987205796177  | 0.3318658155891185 |                    |                    |                    |
| 0.2978514940398966 | 0.4968110755960637  | 0.8254089488593124 |                    |                    |                    |
| 0.2017901118150647 | 0.9825618925320327  | 0.3333894037427072 |                    |                    |                    |
| 0.7028217585056709 | 0.4955375227463463  | 0.8194436744843330 |                    |                    |                    |
| 0.2445737112020296 | 0.0217194623886456  | 0.0086376796689223 |                    |                    |                    |
| 0.758369452291249  | 0.5067189952318358  | 0.497310702382082  |                    |                    |                    |
| 0.7506841541247979 | 0.0034388912083259  | 0.0057377776314951 |                    |                    |                    |
| 0.2488683886386909 | 0.5087172627720733  | 0.5005660222571677 |                    |                    |                    |
| 0.4131562729107117 | 0.6986153336875063  | 0.0018598514642036 |                    |                    |                    |
| 0.3234215344851563 | 0.2028232333703031  | 0.7224344499753812 |                    |                    |                    |
| 0.8165192992363401 | 0.7022507625386964  | 0.1956382278403055 |                    |                    |                    |
| 0.6832121523184398 | 0.7964818809778933  | 0.6952183967295724 |                    |                    |                    |
| 0.1647658006226962 | 0.3056515202673324  | 0.2158953311895146 |                    |                    |                    |
| 0.6852121699721465 | 0.2043967609579838  | 0.3025723721280968 |                    |                    |                    |
| 0.1724001871782335 | 0.7029776159621477  | 0.7828575460264844 |                    |                    |                    |
| 0.3350635797150119 | 0.8106200036466191  | 0.2843720914372838 |                    |                    |                    |
| 0.8243837047175049 | 0.2965062667649860  | 0.8034015989074419 |                    |                    |                    |
| 0.6668677797715574 | 0.7994626347072611  | 0.2862564670758232 |                    |                    |                    |
| 0.1770490468486159 | 0.2997580877172652  | 0.8066380744435264 |                    |                    |                    |
| 0.3151417828298690 | 0.2096521870032362  | 0.3097258339336122 |                    |                    |                    |
| 0.8306046393358670 | 0.7005109606908562  | 0.7832273535171410 |                    |                    |                    |
| 0.3188869442963025 | 0.8030704999675393  | 0.7016715215251281 |                    |                    |                    |
| 0.8364512854855519 | 0.2989041975346467  | 0.2143015213854014 |                    |                    |                    |
| 0.6759643472471524 | 0.20134049479804609 | 0.7192646228299182 |                    |                    |                    |
| 0.1867032971837048 | 0.7074167602185426  | 0.1952700665803064 |                    |                    |                    |
| 0.0845179763256212 | 0.1971212340220916  | 0.5078200232305647 |                    |                    |                    |
| 0.5905546089820888 | 0.6944504806706675  | 0.9944349519002387 |                    |                    |                    |
| 0.9182875495306320 | 0.7916814372665826  | 0.4928462019351159 |                    |                    |                    |
| 0.4159039920404197 | 0.2914199982642671  | 0.0118721431891302 |                    |                    |                    |
| 0.9185501588290137 | 0.1945930499827924  | 0.5080532703848775 |                    |                    |                    |
| 0.0836126347011259 | 0.79337880279800473 | 0.4901693271716780 |                    |                    |                    |
| 0.5839913202119149 | 0.2937347764047900  | 0.0078857281054781 |                    |                    |                    |
| 0.2655799026829726 | 0.0038359627122659  | 0.8024810074566631 |                    |                    |                    |
| 0.7777814914444292 | 0.4950837581139140  | 0.2919516695421933 |                    |                    |                    |
| 0.7307887860991471 | 0.9995877063823428  | 0.7964463309132697 |                    |                    |                    |
| 0.2253184378427946 | 0.4989923245306827  | 0.2938943824606000 |                    |                    |                    |
| 0.7277887461544026 | 0.9977931642084386  | 0.2124694865452526 |                    |                    |                    |
| 0.2261721541917296 | 0.5008091875847001  | 0.7077015271565159 |                    |                    |                    |
| 0.2704223150450460 | 0.0047112670269982  | 0.2119128565334734 |                    |                    |                    |
| 0.7754771226212753 | 0.4984625288259181  | 0.7053198171136117 |                    |                    |                    |
| 0.1495059926617586 | 0.9938391628777694  | 0.5022353850919998 |                    |                    |                    |

  

|                      |                    |                    |
|----------------------|--------------------|--------------------|
| Re5(H13C4O74Al1Si35) |                    |                    |
| 0.5049185670157428   | 0.6568559608507769 | 0.7992158654216368 |
| 0.5077655207830176   | 0.6283671931154231 | 0.3720365042858802 |
| 0.4969406320326328   | 0.7325400110571465 | 0.5022678897844557 |
| 0.4250121587332458   | 0.6521560210398079 | 0.4795347568791115 |
| 0.5043950460797006   | 0.4858228449479896 | 0.7773717184446909 |
| 0.51882820116033682  | 0.4773266616122314 | 0.5419074801183115 |
| 0.4321953153132299   | 0.5051683877092117 | 0.6272595537310437 |
| 0.4832811275933437   | 0.2741481259462617 | 0.6324186391106537 |
| 0.4635548209282518   | 0.3161970897962547 | 0.4147167297542538 |
| 0.5507972030219221   | 0.2776579678144060 | 0.4675626556856329 |
| 0.4750787381763431   | 0.0367794054122399 | 0.4874218442601617 |
| 0.5585442607117841   | 0.0932448988642989 | 0.5143714570833851 |
| 0.4905724029238243   | 0.1108085874114906 | 0.6758933515516503 |
| 0.4824073910694011   | 0.6590543972971830 | 0.4891286984250556 |
| 0.4892595856675968   | 0.5134197016641124 | 0.6475670069967450 |
| 0.4943778698816672   | 0.2652067838797549 | 0.4904943827724608 |
| 0.5011368933838938   | 0.1008600467543630 | 0.5332126599898004 |
| 0.3110765385378969   | 0.0943290671632937 | 0.7277349792291119 |
| 0.3902490709523292   | 0.2358437549865187 | 0.8340082832966473 |
| 0.8161165213126793   | 0.5892155997792869 | 0.2244483342913313 |
| 0.8742461838580766   | 0.7487435110429388 | 0.3277697979483705 |
| 0.6850800390606224   | 0.9049506727608829 | 0.7527627611617120 |
| 0.6356955175364476   | 0.7369188070618478 | 0.8314109466925359 |
| 0.1690187802751524   | 0.4173912584370356 | 0.2729172048770607 |
| 0.1001799181211211   | 0.2593580140060254 | 0.3281522122952083 |
| 0.6868049534809089   | 0.0913709664080713 | 0.2708698456617995 |
| 0.6236034199736480   | 0.2499445159381395 | 0.1825286626994540 |
| 0.1781941048570346   | 0.5935739553500312 | 0.7574132617140918 |
| 0.1051508030226884   | 0.7460232858436626 | 0.6758153692862692 |
| 0.3275676113257830   | 0.9220217023345754 | 0.2183637903844371 |
| 0.4046183782889727   | 0.7677533698912313 | 0.1922046751072983 |
| 0.8215754769828010   | 0.4041079116802209 | 0.7379045886071793 |
| 0.8740428929902819   | 0.2359555167029725 | 0.6738310206274107 |
| 0.6741546916275922   | 0.9091734626237411 | 0.2427944516061302 |
| 0.6015974271650890   | 0.7541449724401446 | 0.1751448860245475 |
| 0.1783172267990878   | 0.4106517677206085 | 0.7363496002697971 |
| 0.1258438549188909   | 0.2417728421929284 | 0.6766946483899616 |
| 0.3130805789726239   | 0.1009764997764387 | 0.2838781863951922 |
| 0.3738355355998593   | 0.2599218108808827 | 0.1860057618811837 |
| 0.8221273814523471   | 0.5871707399100927 | 0.7628152968931587 |
| 0.9007727946813233   | 0.7344594202957353 | 0.6757874888697017 |
| 0.3113705631766877   | 0.9126977920613868 | 0.7804838220423918 |
| 0.3769607254967582   | 0.7493515861456288 | 0.8137035389107794 |
| 0.8326194292516078   | 0.4080576042779498 | 0.2738043789114144 |
| 0.8982252098892403   | 0.2472660922957246 | 0.3250213682159711 |
| 0.6826539179988629   | 0.0881140245058845 | 0.7455168453923164 |
| 0.6082211839167400   | 0.2386001067376995 | 0.8282562018230024 |
| 0.1921584422258249   | 0.5970161095783695 | 0.2240355060777546 |
| 0.1294375048401406   | 0.7530524379113572 | 0.3252140058993973 |
| 0.3256631717159024   | 0.2410137673827961 | 0.5166179764888383 |
| 0.1050726835382108   | 0.0914167783709274 | 0.4763758597208323 |
| 0.8394461994114408   | 0.7246685890911451 | 0.9920502598814736 |
| 0.6145984003476244   | 0.5857847161665859 | 0.0279049520443024 |
| 0.6520054210015616   | 0.7847100346243536 | 0.4968444565386889 |
| 0.9006454885744688   | 0.9006220077852447 | 0.5169570119851343 |
| 0.1420766881581486   | 0.301646833449822  | 0.0058329174563596 |
| 0.3996740415783222   | 0.4051043496075692 | 0.9811382677713993 |
| 0.6708741160803626   | 0.2251022423463240 | 0.5112584401460367 |
| 0.8986569589185720   | 0.0833916948599835 | 0.4862678980591113 |
| 0.1652822913681931   | 0.7306175765215173 | 0.9913978177866056 |
| 0.3920797976054473   | 0.5860171289828244 | 0.0313724792586640 |
| 0.3467298205631764   | 0.8145443830852557 | 0.4975754841269762 |
| 0.0968229568572525   | 0.9084519761304222 | 0.5005491053921602 |
| 0.8555977689252785   | 0.2923936635685322 | 0.0045908573294966 |
| 0.6010809023367045   | 0.4033799078036253 | 0.9911925443028267 |
| 0.2536671155611288   | 0.2590669253201980 | 0.8158745008066859 |
| 0.7637790244379161   | 0.7533688930428681 | 0.6976536520100822 |

|                    |                     |                    |                    |                     |                    |
|--------------------|---------------------|--------------------|--------------------|---------------------|--------------------|
| 0.7612042368429570 | 0.2481097186878714  | 0.2500985572712509 | 0.5442745537573117 | 0.3305647639998242  | 0.5798422797331639 |
| 0.2652038000135875 | 0.7553671172594250  | 0.2321868546617694 | 0.4846443170946344 | 0.6719271978830008  | 0.4876664649194211 |
| 0.7392650265918093 | 0.7437466627116223  | 0.2302078697379812 | 0.4866788723449886 | 0.5243832229991270  | 0.6395925849695985 |
| 0.2367165198671515 | 0.2540049533209654  | 0.2509449754305351 | 0.5004859597250686 | 0.3003849728818864  | 0.5021537314156177 |
| 0.2432707547612267 | 0.755812324247702   | 0.6996165755391175 | 0.3141048299128997 | 0.0910552500730191  | 0.7293439100981303 |
| 0.7455319572915187 | 0.2522987004651185  | 0.8061326802410278 | 0.3941853251986061 | 0.2329047196771370  | 0.8302508239369502 |
| 0.0005534910953457 | 0.2060033114328021  | 0.5490837370736372 | 0.8155871103627277 | 0.5901832512059926  | 0.2247118653493274 |
| 0.5078729535276025 | 0.6924106207205938  | 0.9320544461499054 | 0.8723086083610312 | 0.7505121017334773  | 0.3285663174804228 |
| 0.0018386254737379 | 0.7773871792341609  | 0.4500381376924025 | 0.6856248725686882 | 0.9058602742010819  | 0.7538320995326302 |
| 0.4991813948762527 | 0.2794813510772869  | 0.0320589927196053 | 0.6346527638468515 | 0.7387684703541026  | 0.8311136735782796 |
| 0.1914604887965012 | 0.9994648586548607  | 0.6911455126772097 | 0.1681409836318437 | 0.4161313196268281  | 0.2687324541898803 |
| 0.7079241075918574 | 0.4725751227210253  | 0.1736410529093249 | 0.1027756991837592 | 0.2557641295563897  | 0.3257859192062895 |
| 0.8039128990804087 | 0.9989885205848665  | 0.6865627505976661 | 0.6846030254209268 | 0.0933886136928948  | 0.2693606492860212 |
| 0.2966943388849899 | 0.4734907629168603  | 0.1785878529096365 | 0.6244726992427161 | 0.2546574885525317  | 0.1822659697671938 |
| 0.7984263314560707 | 0.9815533383206088  | 0.3331307465458480 | 0.1773744760802671 | 0.5906534894537856  | 0.7554119306337697 |
| 0.2974056875065472 | 0.4996223195387230  | 0.8265340307159477 | 0.1027621134320640 | 0.7415545301558382  | 0.6724310897840411 |
| 0.2047575883322992 | 0.9854398122452537  | 0.3363121595556464 | 0.3252901513372066 | 0.9200613198809720  | 0.2175481306576046 |
| 0.7022588959283738 | 0.4936517907502136  | 0.8191844683609943 | 0.4021580482474576 | 0.7659578491429002  | 0.1895633534932983 |
| 0.2456894528353857 | 0.0245706686136913  | 0.0093810466828970 | 0.8198599040197934 | 0.4053665939544899  | 0.7398977127496167 |
| 0.7532720334415757 | 0.5061813769605550  | 0.4972619996532615 | 0.8751932894489229 | 0.2392544355478847  | 0.6746423200139446 |
| 0.7506121912748753 | 0.0014822151022571  | 0.0069903630747348 | 0.6749355156440302 | 0.9109172370870340  | 0.2430952056441953 |
| 0.2503695478560033 | 0.5103947470118939  | 0.5004073754968132 | 0.6007007038997898 | 0.7573387365764290  | 0.1750441057199126 |
| 0.5081514276752728 | 0.6111721205732437  | 0.6453072221099561 | 0.1801175560006385 | 0.4078086825428429  | 0.7366166220940258 |
| 0.4729401660510533 | 0.1752745224676886  | 0.4304061468888776 | 0.1285736509357278 | 0.2387930540965897  | 0.6740117816288418 |
| 0.4139317927360295 | 0.7018360533612267  | 0.0017128095807166 | 0.3112405809743137 | 0.0987052475404937  | 0.2817824845992760 |
| 0.3199792158197994 | 0.2069748748089140  | 0.7214613583493161 | 0.3777223990486505 | 0.2527453515308409  | 0.1845640172705103 |
| 0.8178038767125955 | 0.7017220215047928  | 0.1954412144942594 | 0.8234917532296180 | 0.5883805262947490  | 0.7599719729866479 |
| 0.6844744034020849 | 0.7955164698876374  | 0.6957628883167928 | 0.9001444170390371 | 0.7379988829833408  | 0.6764952088138259 |
| 0.1629405487560760 | 0.3080262873410575  | 0.2147527250628229 | 0.3106599630462483 | 0.9094494824807740  | 0.7798927345173325 |
| 0.6855444039494714 | 0.26384161669915127 | 0.3022914278901449 | 0.3745409797672394 | 0.74481403048080093 | 0.8108461089427550 |
| 0.1738612973968898 | 0.7064748705157058  | 0.7822490221288305 | 0.8311901322494819 | 0.4090053045028981  | 0.2737499542744928 |
| 0.3366360690422496 | 0.8140381124619083  | 0.2840432121479353 | 0.8985179402327574 | 0.2495550687191113  | 0.3253628517110414 |
| 0.8246868713917550 | 0.2960755742955925  | 0.8041914844671467 | 0.6815969316251511 | 0.0886000992852871  | 0.7422803172249104 |
| 0.6678967195226306 | 0.7985290443185349  | 0.2869538679499897 | 0.6083470325090730 | 0.2394896249188960  | 0.8284306542727862 |
| 0.1748450692945056 | 0.3036601498226972  | 0.8075278559100099 | 0.1897398818815219 | 0.5958162842154806  | 0.2252257430767912 |
| 0.3134768450393324 | 0.2134628755299204  | 0.3089207107115897 | 0.1274199253384722 | 0.7528082261059978  | 0.3223629957260954 |
| 0.8317945650877405 | 0.6995172705903414  | 0.7830580558757063 | 0.3310065133630076 | 0.2356251397738589  | 0.5142575544123389 |
| 0.3204099751118576 | 0.8069937817103110  | 0.7014157091676836 | 0.1024513479614768 | 0.0888730037068015  | 0.4774251792182227 |
| 0.8365346675972702 | 0.2987053428881055  | 0.2136429154178998 | 0.8389709284740263 | 0.7253421110023766  | 0.9920666251559851 |
| 0.6768336471152665 | 0.2007822820476335  | 0.7214811090992512 | 0.6131002814981201 | 0.5883912445623736  | 0.0295690263607824 |
| 0.1886519422230108 | 0.7095031743029310  | 0.1950594987754641 | 0.6517928668974946 | 0.7865693299088719  | 0.4966283353726197 |
| 0.0839951629607540 | 0.1998533821349540  | 0.5068241712164863 | 0.8999501339072182 | 0.9032091577313892  | 0.5138323670320233 |
| 0.5917343924536524 | 0.6933655641080065  | 0.9947234582266518 | 0.1455220175211451 | 0.2967273434882722  | 0.0039750675009387 |
| 0.9195272036964113 | 0.7905942952897504  | 0.4930650234082492 | 0.3973048461447419 | 0.4016189990365646  | 0.9805234506771967 |
| 0.4144680025031064 | 0.2946039673491256  | 0.0097970916976422 | 0.6701756397105001 | 0.2278002049874388  | 0.5112058025253319 |
| 0.9180018900921709 | 0.193268957668752   | 0.5083117783837565 | 0.8994388930338246 | 0.0859746102431842  | 0.4888100241631435 |
| 0.0849296798983659 | 0.7961860450055696  | 0.4885581132600691 | 0.1621570366774066 | 0.7273885969351639  | 0.9890175245055346 |
| 0.5830118278776553 | 0.2919484977109761  | 0.0093444542337338 | 0.3937836696235948 | 0.5831737562257331  | 0.0300513767629127 |
| 0.2650610161971017 | 0.2067454817641490  | 0.8021727936342842 | 0.3437525803537724 | 0.8112206430283209  | 0.4951996244569372 |
| 0.7778386556837305 | 0.4945702094356292  | 0.2923305762437565 | 0.0969372700292368 | 0.9062956009285372  | 0.5052832111502710 |
| 0.7308927127939100 | 0.9984040944932033  | 0.7975659870535878 | 0.8548282650482548 | 0.2934206057828206  | 0.0052992612956970 |
| 0.2272606322297506 | 0.5004258844236986  | 0.2934612133287615 | 0.6010580292014680 | 0.4060950347431671  | 0.9861246166767685 |
| 0.7279262345748236 | 0.9965646949567954  | 0.2139194547086163 | 0.2569907864353453 | 0.2569778588932508  | 0.8107896074650611 |
| 0.2262948371505047 | 0.5036186955733868  | 0.7067461613722159 | 0.7629154479041347 | 0.7532339492249136  | 0.6978178905454797 |
| 0.2725787365523686 | 0.0082828189461779  | 0.2122720596437588 | 0.7613972861962424 | 0.2475287243849955  | 0.2522544230653949 |
| 0.7749781295948992 | 0.4975132042778228  | 0.7051769789314122 | 0.2628367308496991 | 0.753813630887004   | 0.2271898427125407 |
| 0.1505468243646462 | 0.9965229654773680  | 0.5011998872036330 | 0.7379510411486905 | 0.7440779005268183  | 0.2282652051808753 |
| 0.6573379449124417 | 0.4883704361276813  | 0.0022209989397410 | 0.2401718634460579 | 0.2569293120050133  | 0.2533355631753267 |
| 0.8501860476789673 | 0.9912653871657184  | 0.5054701080590291 | 0.2405904414014657 | 0.7543503837014143  | 0.6988628382295161 |
| 0.3462189420748274 | 0.4937705129561962  | 0.0056991282423624 | 0.7457271491993183 | 0.2513888406677083  | 0.8048404143136949 |
|                    |                     |                    | 0.0014632492388031 | 0.2093028392138976  | 0.5480088654391935 |
|                    |                     |                    | 0.5069394681771371 | 0.6958512383253677  | 0.9318940145205090 |
|                    |                     |                    | 0.0002257666684287 | 0.7785158745762288  | 0.4472916791418058 |
|                    |                     |                    | 0.5005309853111228 | 0.2809338347798089  | 0.0315841439126601 |
|                    |                     |                    | 0.1930021340751509 | 0.0003416257567679  | 0.6854973867172021 |
|                    |                     |                    | 0.7066366239351893 | 0.4748210476088559  | 0.1741262944273885 |
|                    |                     |                    | 0.8038832514768899 | 0.0011437849866809  | 0.6867950680148383 |
|                    |                     |                    | 0.2954034846086415 | 0.47418638868875290 | 0.1748638868875290 |
|                    |                     |                    | 0.7980814666956846 | 0.9870094360495614  | 0.3329236275567169 |
|                    |                     |                    | 0.2982261056985749 | 0.5001501211046033  | 0.8229010411161539 |
|                    |                     |                    | 0.2017715544297403 | 0.9846713661845712  | 0.3304812753835122 |
|                    |                     |                    | 0.7021888248699781 | 0.4991023397716248  | 0.8203212297068063 |

Re6(H11C3O74Al1Si35):

|                    |                    |                    |
|--------------------|--------------------|--------------------|
| 0.5049294567026834 | 0.6629328623945199 | 0.7938142220789786 |
| 0.5094041040658013 | 0.6415885467328550 | 0.3695760625308679 |
| 0.5011419224790288 | 0.7444848613465140 | 0.5043720590303948 |
| 0.4271910294169246 | 0.6676184944375620 | 0.4780908408553017 |
| 0.5034109219893566 | 0.4931927752097138 | 0.7652107092584970 |
| 0.5123931843274363 | 0.4891677919346833 | 0.5279153095983702 |
| 0.4290726416691939 | 0.5201817247223488 | 0.6256784980263745 |
| 0.4893174297901908 | 0.1829378208308512 | 0.6292419294360414 |
| 0.4502618393090003 | 0.3296107432212665 | 0.5495215004634488 |
| 0.5070916903875897 | 0.3202435040949752 | 0.3632528398070676 |

|                    |                    |                    |                    |                     |                    |
|--------------------|--------------------|--------------------|--------------------|---------------------|--------------------|
| 0.2448079382841470 | 0.0229842949147994 | 0.0058097446997962 | 0.1034869340585800 | 0.7175266363495325  | 0.6690452031689702 |
| 0.7524635736582326 | 0.5075185169357752 | 0.4976358259238793 | 0.3226737109014621 | 0.8860767340538160  | 0.2551083860354311 |
| 0.7500221014777964 | 0.0045238668586407 | 0.0066171112197893 | 0.3982416411728877 | 0.7335210387527908  | 0.1865217636668248 |
| 0.2498552476968072 | 0.5081309771537832 | 0.4977985723188212 | 0.8232258858977701 | 0.3819152548649427  | 0.7698006442338325 |
| 0.5091896187237808 | 0.6208061555669602 | 0.6414731152063169 | 0.8788443230943273 | 0.2194568845330522  | 0.6759481813125134 |
| 0.5008533045040835 | 0.2008947632642943 | 0.5083425822349383 | 0.6850063315848587 | 0.8807317525473763  | 0.2638435578028009 |
| 0.4130773697397672 | 0.7000042336673715 | 0.9997953767328767 | 0.6134576291089289 | 0.7260210743656614  | 0.1838349108105177 |
| 0.3233104662414448 | 0.2034454436153439 | 0.7195641834239979 | 0.1834611102213728 | 0.3783460922367752  | 0.7595402424511306 |
| 0.8167343163535179 | 0.7026380633516638 | 0.1951185134619990 | 0.1291267833476297 | 0.2138616572661221  | 0.6760496153731452 |
| 0.6840610016033324 | 0.7967146165257191 | 0.6959089783126728 | 0.3180945619408959 | 0.0686448529672674  | 0.2365238915099326 |
| 0.1647684884019895 | 0.3062686599216704 | 0.2132502935212131 | 0.3833157933294444 | 0.2283521212385651  | 0.1777275092721737 |
| 0.6846052564324125 | 0.2056632820267339 | 0.3032235838353969 | 0.8331243586955850 | 0.5648868641362839  | 0.7362697595001890 |
| 0.1715948995716303 | 0.7034609074013503 | 0.7801300364207648 | 0.9114603526236138 | 0.7161111504401774  | 0.6797639258896808 |
| 0.3341926306974727 | 0.8118885685047132 | 0.2815186989913343 | 0.3090304169329343 | 0.8820885487179595  | 0.7123230537738223 |
| 0.8241851145219528 | 0.2971716091318868 | 0.8046886086208360 | 0.3799797292942984 | 0.7299562588791346  | 0.8027251951734868 |
| 0.6675103799269166 | 0.8005055674881589 | 0.2866564988996956 | 0.8251937848806961 | 0.3820328532923867  | 0.2438409922317675 |
| 0.1775986307287596 | 0.3004068074923012 | 0.8051772413422782 | 0.8957900203807441 | 0.2277121684185914  | 0.3233343359137493 |
| 0.3153120323200937 | 0.2108620757643394 | 0.3070357766429268 | 0.6792220663536668 | 0.0634208775497527  | 0.7694238663305626 |
| 0.8315856528120307 | 0.7008356714219630 | 0.7827564906467401 | 0.6057806728753334 | 0.2179854639524947  | 0.8218144308221653 |
| 0.3183544225576469 | 0.8037557683206131 | 0.6997633665736629 | 0.1872380290225308 | 0.5711309067510157  | 0.2616137281211834 |
| 0.8359146735520753 | 0.2995605211446986 | 0.2144373785894302 | 0.1309239070370865 | 0.7366914656915853  | 0.3216771276876642 |
| 0.6763740998401815 | 0.2013167549416153 | 0.7195484502030851 | 0.3527110367426900 | 0.1822108955231201  | 0.5033759128359421 |
| 0.1861455059136503 | 0.7079712405505063 | 0.1927220576352227 | 0.0989283032325261 | 0.0672598414443399  | 0.4733806423260916 |
| 0.0846164650743901 | 0.198467314280731  | 0.5058628509119174 | 0.8628260210867253 | 0.6800974717969339  | 0.0006237764590864 |
| 0.5906047812039290 | 0.6961333446483735 | 0.9951927125876949 | 0.6054866748409324 | 0.5650538268371577  | 0.0092775757461112 |
| 0.9181697363960666 | 0.7929261368792666 | 0.4921134636425819 | 0.6787089926967127 | 0.7409579066839527  | 0.4947843891650763 |
| 0.4158528343620134 | 0.2923410148217158 | 0.0082046512003515 | 0.8975554157563863 | 0.8825992402264475  | 0.5258630537745717 |
| 0.9186364873306445 | 0.1960334001969670 | 0.5089085632162025 | 0.1655043162729299 | 0.2480507967065293  | 0.0056845676499506 |
| 0.0833799185415671 | 0.7946531809255077 | 0.4875765180508509 | 0.3910697350344350 | 0.3792362718446896  | 0.9763763361375339 |
| 0.5842265557601820 | 0.2945925507996350 | 0.0079374464255153 | 0.6522011138597890 | 0.17919388602238047 | 0.5025463851431624 |
| 0.2657505622005729 | 0.0046875957818457 | 0.7998092419205776 | 0.9061461305096259 | 0.0653762540995686  | 0.4925306544321373 |
| 0.7768117776461381 | 0.4958470357493709 | 0.2925969243216429 | 0.1448217590138015 | 0.6761456209465351  | 0.9933732891995959 |
| 0.7306118051742629 | 0.0001213887727474 | 0.7970873366522682 | 0.4054453726864864 | 0.5610676584373167  | 0.9963421812500286 |
| 0.2260682687334068 | 0.4994943229506532 | 0.2911325311471487 | 0.3244908953677097 | 0.7444868286188751  | 0.4823538352118106 |
| 0.7272838414097151 | 0.9996855694743729 | 0.2136236937107441 | 0.1103350089981561 | 0.8857955193599025  | 0.5229898274956994 |
| 0.2266146237753262 | 0.5018486130036663 | 0.7047226137456590 | 0.8386384314880004 | 0.2465111415453620  | 0.0061422522005827 |
| 0.2705735777484080 | 0.0063254583969795 | 0.2093254583234222 | 0.6139983902234789 | 0.3822296518231454  | 0.9813680256732056 |
| 0.7746945232049356 | 0.4996881802524911 | 0.7053122519965243 | 0.2649241789424082 | 0.2276838730040893  | 0.7647639209345414 |
| 0.1495614187198271 | 0.9952214818904892 | 0.4995974474224028 | 0.7763560923287756 | 0.7362650768596737  | 0.7426947812988303 |
| 0.6566674478182719 | 0.4917669418664019 | 0.0019844092295287 | 0.7573638093824542 | 0.2216028717952412  | 0.2895799970340676 |
| 0.8499899691233992 | 0.9945098358117477 | 0.5052501927781989 | 0.2577954135408547 | 0.7264342627240126  | 0.1751889987313007 |
| 0.3460695049087548 | 0.4926152671943029 | 0.0035634102358415 | 0.7516288309281904 | 0.7205835792033142  | 0.1945365040773908 |

TS1 (H13C4O74AlSi35):

|                    |                    |                     |                     |                    |                    |
|--------------------|--------------------|---------------------|---------------------|--------------------|--------------------|
| 0.5083114200024141 | 0.7496223302064351 | 0.7174439336403680  | 0.2397522670217924  | 0.7231602452613188 | 0.7523951790522219 |
| 0.4951275212955863 | 0.8227132909042467 | 0.3628536386711048  | 0.7424862261337566  | 0.2306916585162142 | 0.7544166696592640 |
| 0.5331896864751542 | 0.8938746308566650 | 0.5346300523616847  | 0.0035428138802445  | 0.1968398941046843 | 0.5344051037389761 |
| 0.4436745437384246 | 0.8543635344617044 | 0.5521964328644984  | 0.5121331102749735  | 0.6999644256776278 | 0.9415614769330176 |
| 0.5558564638544752 | 0.6286069884712049 | 0.4390227529439841  | 0.0053153588914086  | 0.7730412844785164 | 0.4453199632762477 |
| 0.4578734802703650 | 0.6429490092592616 | 0.4328692372665444  | 0.50350271268423704 | 0.274353840588444  | 0.0347128259469400 |
| 0.5025342684005167 | 0.6033987088646811 | 0.6430169762513884  | 0.2023150362480663  | 0.0013517370689513 | 0.6703387395535358 |
| 0.5542395415473180 | 0.3703683729510914 | 0.4496058661939202  | 0.7043107369573960  | 0.4731459427876672 | 0.1859699673814958 |
| 0.5597219566176506 | 0.4435252833453589 | 0.6432248743662541  | 0.8027033872699363  | 0.9915466928483312 | 0.6779473207343827 |
| 0.6051740125393152 | 0.4759244022092943 | 0.4429062559382047  | 0.3043560823442348  | 0.4748283251504546 | 0.1817323987671031 |
| 0.3893500309761961 | 0.4962532918837681 | 0.4456083712288006  | 0.8048858460255772  | 0.9733453786903965 | 0.3241656853981496 |
| 0.4282653886802734 | 0.3822873695324489 | 0.4524946208620833  | 0.2951918720124809  | 0.4866503557261197 | 0.8286192336283804 |
| 0.4323164566542204 | 0.4563959445450152 | 0.6455707101262718  | 0.2011282492722941  | 0.9744541416287475 | 0.3162450149561380 |
| 0.4966031800213315 | 0.8362001575447735 | 0.5057552163430401  | 0.7106244542887694  | 0.4890448067943893 | 0.8308743639217866 |
| 0.5053411859583221 | 0.6227999228700725 | 0.5042393386835613  | 0.2508683789454267  | 0.9674229544290469 | 0.9924904764673244 |
| 0.5580760061588634 | 0.4427158517832126 | 0.4973417707497845  | 0.7565450344645512  | 0.4679194677415950 | 0.5054333005251053 |
| 0.4325365276231707 | 0.4546396031239865 | 0.4998452842696892  | 0.7535960405725817  | 0.9631729280277597 | 0.9998983156279166 |
| 0.3291997964432340 | 0.0611613260432975 | 0.7628889837513810  | 0.2516934871557339  | 0.4647511449305881 | 0.5006310534081422 |
| 0.4024379043726825 | 0.2139369785909295 | 0.8239008720990668  | 0.5225874397468360  | 0.7528800441781485 | 0.5910763427601738 |
| 0.8242678619710659 | 0.5648349655679539 | 0.2568134691546931  | 0.4975803563199577  | 0.4941635047589656 | 0.4332655269129688 |
| 0.8790289260880257 | 0.7296629965157138 | 0.3356992059903803  | 0.4215511621722925  | 0.6807215526567916 | 0.9861609403543596 |
| 0.6900003971038871 | 0.8815336694340132 | 0.7242014159803034  | 0.3361526729066924  | 0.1709168284566260 | 0.7131988342764046 |
| 0.6436234158733143 | 0.7165050570825500 | 0.8354580314869793  | 0.8297891735530385  | 0.6738558386119848 | 0.198021449895041  |
| 0.1808096291352115 | 0.3884193093817316 | 0.23203669401065259 | 0.6960901747659776  | 0.7684988891233431 | 0.7003333254128208 |
| 0.1107673739209076 | 0.2357671772196284 | 0.3257935432289898  | 0.1768566519076984  | 0.2754263466489490 | 0.2124772743059680 |
| 0.6855014079725308 | 0.0637443774068700 | 0.2409315610493152  | 0.6803038089732354  | 0.1727392488219692 | 0.2999642559740323 |
| 0.6249684533436408 | 0.2275688138447052 | 0.1741111775874771  | 0.1661004707081872  | 0.6695955275842707 | 0.7852647600681522 |
| 0.1720872230794157 | 0.5600544799168503 | 0.7279651149860058  | 0.3271300292976207  | 0.7720555655454575 | 0.2734484340505716 |
|                    |                    |                     | 0.8210642209793519  | 0.2693799406641446 | 0.8001156143960202 |

|                    |                    |                     |                    |                    |                    |
|--------------------|--------------------|---------------------|--------------------|--------------------|--------------------|
| 0.6825146392755386 | 0.7676103062605932 | 0.2854181859966261  | 0.6130534249526960 | 0.2336405605337291 | 0.8474938419056741 |
| 0.1858838591323817 | 0.2671132798736977 | 0.8001416415679117  | 0.1897478990686992 | 0.5813487897040091 | 0.2129776508945369 |
| 0.3252070714143969 | 0.1764651535855322 | 0.2995280713219728  | 0.1201268971227165 | 0.7315782416137111 | 0.3157181804546951 |
| 0.8454963829245798 | 0.6739676371332877 | 0.7901891820167748  | 0.3367532045508526 | 0.2220831961723277 | 0.5017963197586468 |
| 0.3146058502578057 | 0.7683792069543927 | 0.6919779120383964  | 0.0977606665543433 | 0.0775734716751870 | 0.4759721598786655 |
| 0.8291773127299109 | 0.2695086706329235 | 0.2151047088166322  | 0.8370956254381241 | 0.7243053077929531 | 0.0058182925046992 |
| 0.6708556207365177 | 0.1723448443673092 | 0.7122984736031981  | 0.6158598443297691 | 0.5875267204146652 | 0.0467796186612759 |
| 0.180828889560572  | 0.6778259657598653 | 0.1890625550345675  | 0.6513761777362248 | 0.7909639599814469 | 0.5117635923741517 |
| 0.0866182158717734 | 0.1785042356889193 | 0.5017937141473965  | 0.8981402405967955 | 0.9004969470100832 | 0.5088479312419523 |
| 0.5923833264692249 | 0.6778862571279518 | 0.9923163124171026  | 0.1489765052933905 | 0.2825721072343654 | 0.9933803892831037 |
| 0.9234028764412869 | 0.775502804427377  | 0.49775151726171997 | 0.3934380136773896 | 0.3917880385468280 | 0.9539291363355460 |
| 0.4189454376367223 | 0.2740412219404504 | 0.0028893053885284  | 0.6595227043719447 | 0.2301808588452232 | 0.5215194508549175 |
| 0.9207515061847502 | 0.1770475465932790 | 0.5065385675587564  | 0.8987626528653010 | 0.0838634970044083 | 0.5104329220250250 |
| 0.0886663974867616 | 0.7776113218239971 | 0.4902908956022074  | 0.1607334827484408 | 0.7147134719781008 | 0.9837914904180565 |
| 0.5872291752683267 | 0.2750468858513244 | 0.0028503178721166  | 0.3959975941208214 | 0.5724138774035481 | 0.0141325320665970 |
| 0.2726720777253036 | 0.9763115605468116 | 0.7853158883840763  | 0.3416599067108450 | 0.8042741458209406 | 0.4890281886021057 |
| 0.7780654331568044 | 0.4722341353672732 | 0.2972492246183194  | 0.1013889515430435 | 0.8951262030596823 | 0.4782031464261678 |
| 0.7317058656973003 | 0.9743509601993807 | 0.7926782119212987  | 0.8499313899495391 | 0.2897741829163820 | 0.0195096800723533 |
| 0.2310158244091696 | 0.4753561085508480 | 0.2921270856692075  | 0.6009481229332678 | 0.4047788774220606 | 0.9904752841107509 |
| 0.7326488525399100 | 0.9704224485113073 | 0.2079587433081400  | 0.2598556784252679 | 0.2510791193046629 | 0.7922493794150967 |
| 0.2258819670295793 | 0.4727596471005242 | 0.7056923405825088  | 0.7632699487338428 | 0.7547160165354541 | 0.7072172890371888 |
| 0.2731790635078752 | 0.9734591261673984 | 0.2004185299064503  | 0.7559760118983476 | 0.2491963304178668 | 0.2683623319516570 |
| 0.7812139781928877 | 0.4758640540583912 | 0.7116897942856468  | 0.2560061683476889 | 0.7447030234204703 | 0.2351748595109697 |
| 0.1540980619958603 | 0.9813820391217831 | 0.4953061716747058  | 0.7380162143066400 | 0.7464415195329082 | 0.2464530841107759 |
| 0.6592271869930428 | 0.4775663083078854 | 0.0017570776744975  | 0.2412305882956360 | 0.2403071977610267 | 0.2475411732393411 |
| 0.8525888149528384 | 0.9776169526628422 | 0.5045065532566042  | 0.2414733760144756 | 0.7424303583760619 | 0.6977665088674954 |
| 0.3495648732616772 | 0.4784365899049945 | 0.9967701228470602  | 0.7489027005961120 | 0.2523390754504078 | 0.7907142159641580 |

TS2 (H11C3O74Al1Si35):

|                    |                    |                    |                     |                    |                    |
|--------------------|--------------------|--------------------|---------------------|--------------------|--------------------|
| 0.5159724309764826 | 0.6545544384007798 | 0.7220592285647243 | 0.5084058807769978  | 0.6925570817135807 | 0.9444307575812942 |
| 0.5009201768207348 | 0.6424970099233605 | 0.3411678740203143 | 0.9984197798362473  | 0.7748095813844174 | 0.4530922812011937 |
| 0.4801148873250298 | 0.7418354549610200 | 0.4733363350204769 | 0.4994980303937311  | 0.2789857026236220 | 0.0244834829050760 |
| 0.4280117893580595 | 0.6383426371193437 | 0.4925036159267364 | 0.1906398316266475  | 0.9896983862767073 | 0.6799288093576834 |
| 0.4963948822521473 | 0.4873110639263416 | 0.6978458630571609 | 0.7031124717618980  | 0.4666852525268226 | 0.1943876874673123 |
| 0.5911831320532102 | 0.4975534719924255 | 0.6320895416712702 | 0.8064650341302055  | 0.9926228041005487 | 0.7062574351363509 |
| 0.5208482023362748 | 0.4971649788697832 | 0.4576041768501042 | 0.2988781611841986  | 0.4642243406489381 | 0.1703329528894528 |
| 0.5846937793805580 | 0.3356608554274487 | 0.5437120984408566 | 0.7942114511968867  | 0.9933010000440774 | 0.3512131504485723 |
| 0.4853195954351222 | 0.2481778317739938 | 0.4787102663882123 | 0.2930775763598064  | 0.4961907709505056 | 0.8205219349943604 |
| 0.4876285798131974 | 0.3502019197265085 | 0.3398022554439493 | 0.2041479261476979  | 0.9890305405791153 | 0.3258178745013041 |
| 0.4336075746720525 | 0.3481260572435545 | 0.5352741604384903 | 0.7054058126012634  | 0.4956850289032104 | 0.8399821758107322 |
| 0.4814023740949835 | 0.6654552457517013 | 0.4706769220514175 | 0.2443758455589418  | 0.0164779621846591 | 0.9969293084600821 |
| 0.5362791527613595 | 0.4888962645573969 | 0.5953671933708193 | 0.7516122947825608  | 0.5040186674043383 | 0.5140117055468778 |
| 0.4828849117979033 | 0.3244773127305862 | 0.4759538079162695 | 0.7480435033056239  | 0.0111873319888147 | 0.0210488931281034 |
| 0.3119772573843704 | 0.0807262931698176 | 0.7158758102302656 | 0.2493754285837966  | 0.4966945415626469 | 0.4906116989657860 |
| 0.3953765320427749 | 0.2195001891092545 | 0.8221558995321914 | 0.5303191845774364  | 0.6314940784794345 | 0.6021242318392979 |
| 0.8093824156144009 | 0.5870336371714444 | 0.2306264844377850 | 0.5395176201124698  | 0.3611673160115458 | 0.5860410924748010 |
| 0.8714871248387439 | 0.7405782808079024 | 0.3448878702229266 | 0.41666356754759875 | 0.6904065292943216 | 0.9896387845498253 |
| 0.6851570478993807 | 0.9050527367997176 | 0.7759384103044269 | 0.3249046131080675  | 0.1921882620137509 | 0.7077239169867156 |
| 0.6375090085311186 | 0.7361119156715930 | 0.8487810155474378 | 0.8142166687214285  | 0.7000152523798988 | 0.2078725797425207 |
| 0.1717742748077100 | 0.4015331530736646 | 0.2587847703228050 | 0.6834628966061373  | 0.7962447964787529 | 0.7116205322855294 |
| 0.1039926809875382 | 0.2422977183661246 | 0.3132548870516985 | 0.1669799770971991  | 0.2920914210674042 | 0.2031099135605245 |
| 0.6792168279254938 | 0.0946092003786276 | 0.2820628731655788 | 0.6792845491988615  | 0.2065810090238571 | 0.3140870031430083 |
| 0.6177797317540126 | 0.2571649039583162 | 0.1993619390356756 | 0.1707078400680402  | 0.6943928799905450 | 0.7738572837534221 |
| 0.1724179632489538 | 0.5819665006097452 | 0.7379981374244338 | 0.3299959537659021  | 0.7997909003616144 | 0.2760800415753479 |
| 0.1030398422230121 | 0.9038184656341490 | 0.6697586372097248 | 0.8271172502652391  | 0.2976016619185984 | 0.8132782994374637 |
| 0.3215250136200751 | 0.7073370003644412 | 0.2060220812675837 | 0.6662117488770889  | 0.8010781590912401 | 0.3006173863277724 |
| 0.3954730141877931 | 0.7510415762214961 | 0.1818601927064805 | 0.1793120102757442  | 0.2908325890404626 | 0.7933661185456344 |
| 0.8243969446847430 | 0.4067102106941149 | 0.7543329757410362 | 0.3183565974171998  | 0.1991500277783231 | 0.2948784369607154 |
| 0.8824699253410202 | 0.2411316038139475 | 0.6928407520229243 | 0.8311846591265990  | 0.7024623439755615 | 0.7950925229243708 |
| 0.6736884019449292 | 0.9116994967667793 | 0.2526925725927072 | 0.3186520997933542  | 0.7938535408705576 | 0.6948265725321789 |
| 0.6011736546968578 | 0.7560853839835460 | 0.1888156280745861 | 0.8321481094190020  | 0.2975802080025218 | 0.2285938903236513 |
| 0.1780491161923266 | 0.3989948709718831 | 0.7300725528679521 | 0.6781715466065847  | 0.1992808034831626 | 0.7260762792386828 |
| 0.1314912033468900 | 0.2282673252676162 | 0.6613174208965447 | 0.1825925774441330  | 0.6938191975314609 | 0.1882192893933166 |
| 0.3200754581123206 | 0.0875730388937939 | 0.2612707430300389 | 0.0849949339828555  | 0.1888091483096233 | 0.4970484976521732 |
| 0.3789846323150385 | 0.2481932850040494 | 0.1755852472361710 | 0.5887235767682739  | 0.6946253650250966 | 0.0078145828671978 |
| 0.8242308156380318 | 0.5898416602296095 | 0.7683262723217794 | 0.9170905150562376  | 0.7897872792566432 | 0.5013149344323509 |
| 0.9003913629993363 | 0.7411204093787518 | 0.6929274642504453 | 0.4147939320854093  | 0.2848440355982049 | 0.9932692642831071 |
| 0.3089298128281683 | 0.8995636871713160 | 0.7754135006949738 | 0.9191750026485366  | 0.1936947134762690 | 0.5204515393151112 |
| 0.3763906309196798 | 0.7367067100996181 | 0.8025152745163595 | 0.0827238490867472  | 0.7847176873286941 | 0.4798378709114672 |
| 0.8298760228961655 | 0.4070223519741276 | 0.2877651848072205 | 0.5831111601093966  | 0.2940815956650482 | 0.0136958408312609 |
| 0.8930190128262012 | 0.2444491615183679 | 0.3388376562638342 | 0.2641642531477117  | 0.9946962844389660 | 0.7914864596956122 |
| 0.6866430078606811 | 0.0870816831499184 | 0.7370939092485500 | 0.7740459924515122  | 0.4925789269627074 | 0.3071508514481707 |
|                    |                    |                    | 0.7319248735154744  | 0.9980402852589592 | 0.8107222773009752 |

0.2278866141922293 0.4871267843697993 0.2826077849401472  
0.7243546495649866 0.0017867762140895 0.2273386752273936  
0.2235727436963231 0.4938931606412638 0.6960243707835048  
0.2723246359374301 0.9986016148870362 0.1982963177163626  
0.7767943798131469 0.4993400470308345 0.7205846076888420  
0.1496141198611411 0.9876669793669777 0.4903246612734904  
0.6567517943586694 0.4902895990540159 0.0176237239164294  
0.8490543470304317 0.9922888838141830 0.5185345938364563  
0.3454176981305395 0.4851073337432936 0.9916002340833288

TS3 (H9C2O74Al1Si35):

0.5049760847699289 0.6242036959011799 0.7390613217506257  
0.5017634879312425 0.6237384424170074 0.3564964996533675  
0.5000252255937028 0.7238782569794182 0.4976803007808712  
0.4253850346843819 0.64773121115976659 0.4889359901280059  
0.4340617128798101 0.4757598701792531 0.5925742858807368  
0.5193463227127708 0.4637103938856981 0.4684151839420423  
0.5174268546542820 0.4436347949914463 0.7122352988937095  
0.4434386227878804 0.3207236409812495 0.4456117305468368  
0.4501030887182225 0.2998890867844040 0.6480279276961696  
0.4831179230895941 0.6510709217228268 0.4838146286491281  
0.4892724588112785 0.4561470885435526 0.5892147772803327  
0.4752085420358938 0.3297105286417903 0.5469562444301701  
0.5150486641728236 0.5950620828937829 0.6213026376328230  
0.3225157041951690 0.0937742900564231 0.7407775507737000  
0.3965451626361656 0.2471263753972224 0.8179552290618304  
0.8160904757295455 0.5875454032520651 0.2251776639028193  
0.8767333068121772 0.7459142662323828 0.3257170188500851  
0.6840643003531923 0.9058356650203265 0.7545290702051872  
0.6321390706983578 0.7385152059992990 0.8303805814223253  
0.1633914945502184 0.4118372314982395 0.2700437313519259  
0.1020906105633230 0.2477325325361832 0.3205491583174762  
0.6851124400770985 0.0915638540524029 0.2674901592133452  
0.6252076570668663 0.2522069540478569 0.1785115060963989  
0.1870758036892539 0.59033048465537794 0.7605195963085620  
0.1054434775115496 0.7335397482220998 0.6726436641287989  
0.3188249489737842 0.9155792147872504 0.2140605696109006  
0.4011267750481551 0.7663187721928750 0.1864986478260207  
0.8220878193505499 0.4040041523030808 0.7426071411632691  
0.8727564692621357 0.2359710531228814 0.6713248919737325  
0.6768930161524978 0.9092334839093894 0.2411583714705117  
0.6033161110776817 0.7551179305199724 0.1744996544096722  
0.1797438820289372 0.4077702902855620 0.7394726044886681  
0.1290022552070980 0.2388920644886738 0.6685651773791150  
0.3080330616080076 0.0944722585364062 0.2842353846524759  
0.3770152001980946 0.2456833130158245 0.1784426232215495  
0.8202607137708497 0.5869535932022885 0.7587689879204902  
0.8985930285323960 0.7344699933747023 0.6768111537966206  
0.3152564744764277 0.9116612124495660 0.7798679130864841  
0.3760187549547283 0.7444220334570275 0.8100430335006052  
0.8343263218530907 0.4063163754073429 0.2689971130803741  
0.8987361114305918 0.2446694624883179 0.3222900592486369  
0.6794136450677613 0.0888322659098506 0.7455962953589506  
0.6051869800850795 0.2406706805337180 0.8248904558904684  
0.1838466357374671 0.5928854016900473 0.2310137865629116  
0.1258654426499248 0.7537354331743344 0.3212268011167552  
0.3363581101795958 0.2326116095364625 0.5079181376828501  
0.0985439988313459 0.0848223424954426 0.4871297795384919  
0.8383858513192450 0.7225916620351853 0.9926841529189758  
0.6188638607438506 0.5881770459349269 0.0309313988752180  
0.6514580883313101 0.7874572294367539 0.4968319806178627  
0.8972917670864504 0.8997833360241074 0.5160136885338815  
0.1473199002331995 0.2918221096294644 0.0016049549715476  
0.4000804684083974 0.4044391205700535 0.0040909892395078  
0.6634704544959789 0.2237792037811275 0.5084523901920477  
0.9017973151830532 0.0822760969526684 0.4913066303537619  
0.1645126607116154 0.7256134592532391 0.9914851013920156  
0.3855592465916828 0.586088205798887 0.0346814333191503  
0.3451046019877779 0.8133439640776672 0.4949739225475511  
0.1020646777810796 0.9024282941791242 0.5239019899973414  
0.8516467764973754 0.2860788416418316 0.0038528027610667  
0.5994540871171381 0.4060484583603667 0.9888706448031499

0.2577278066395436 0.2568438222487046 0.8007743384494788  
0.7614930012230872 0.7537290970294066 0.7012344202795475  
0.7611244814957274 0.2473988446557485 0.2632466392591368  
0.2625709081743892 0.7461313203950297 0.2403888720386007  
0.7408995756888501 0.7436786304849718 0.2382357922169618  
0.2399116892731499 0.2564869338966247 0.2576164866512087  
0.2416678745970415 0.7599449439244736 0.7020522794595152  
0.7427943767989760 0.2534795131454857 0.7960398003772795  
0.0005669525843288 0.2103718951208791 0.5503654024458413  
0.5066109829989003 0.6868809879494364 0.9454824189362370  
0.0012800059646025 0.7802101930258090 0.4593329846182499  
0.5005404766814365 0.2794454804025293 0.0399563222217338  
0.2018046041538213 0.0078894955883371 0.6689967096380656  
0.7094605521151607 0.4683006559037821 0.1679113764298847  
0.8013372499291478 0.0026490327953184 0.6808020515603914  
0.2873324546284479 0.4700116259948075 0.1605550920569598  
0.8001153368075222 0.9879480939098002 0.3271006040667999  
0.3042025281094922 0.4876824644164017 0.8091502725459492  
0.1946578824935372 0.9860758885521435 0.3158722425541214  
0.7011549652988975 0.4912946284634430 0.8142626017806904  
0.2447827445643895 0.0247663924120047 0.9989199810839793  
0.7535783803777676 0.5008820988920917 0.4941567018415398  
0.7506993378097491 0.0047668452057508 0.0034827005381857  
0.2494415121317957 0.5017568329146404 0.4915962835206997  
0.4163636979692100 0.6991724676386113 0.9980667082120007  
0.3257405757421949 0.2054422710845003 0.7164467961638366  
0.8180378085736066 0.7002144658659191 0.1970760141951260  
0.6819223215431620 0.7960806140488330 0.6976480489499224  
0.1631247111213412 0.3023118435177565 0.2123171411557578  
0.6842242508909493 0.20340562601683704 0.3032967686476837  
0.1757342445747341 0.7026127746133923 0.7828158518205797  
0.3333880507711129 0.8085602290534055 0.2821550377978284  
0.8226650578783605 0.2949383763087638 0.8022310617976487  
0.6685573619534253 0.7987135638723188 0.2872237339118300  
0.1776570956762740 0.2994322314300391 0.8016501941395546  
0.3137389178716106 0.2062825892111633 0.3037140310404141  
0.8294207952709201 0.6991940234509215 0.7834189117988259  
0.3212409559395297 0.8050441941399953 0.7003191356289591  
0.8359866235620359 0.2961918149535165 0.2141155021716870  
0.6733690382906303 0.2009442048517940 0.7175964814172531  
0.1851104752667894 0.7054345662300463 0.1972718848374342  
0.0830487662711334 0.1955405185880608 0.5061909727383096  
0.5884669025197979 0.6935541638819700 0.9951292261613389  
0.9181006633762223 0.7902850288979195 0.4948222244806857  
0.4168622212445854 0.2944834842694988 0.0122458254483817  
0.9180821271098978 0.1931957188801121 0.5085555810792641  
0.0848980624920870 0.7921088237612324 0.4946315999439932  
0.5842758363711056 0.2943826199192188 0.0081568379650108  
0.2708110553780827 0.0067657280652324 0.7963866225681429  
0.7784601452376592 0.4918570806981251 0.2891203834473828  
0.7291016481650630 0.9998064094939849 0.7953489903742366  
0.2212746254375944 0.4959752823352304 0.2876598762527820  
0.7283969755048503 0.9981225658862698 0.2104804821497055  
0.2301090670788852 0.4979940527190081 0.7013347504749987  
0.2664471854187269 0.0034621562091317 0.7027636951224471  
0.7743611444929996 0.4960096727126171 0.2029988305676298  
0.1500005433460885 0.9946021338467332 0.4989729043293423  
0.6578407527836063 0.4898135241118098 0.0000594826657121  
0.8496345502142404 0.9929274755905979 0.5037591396182890  
0.3440199675211275 0.4921468868876602 0.0031555370409606

TS4 (H7C3O74Al1Si35):

0.5060489401466484 0.6381007100257676 0.7419819384452353  
0.4998500192709727 0.6314293122467021 0.3570475535596032  
0.4959736415901830 0.7334665798570299 0.4931993085823194  
0.4237207944687640 0.6533781378038626 0.4924915371196548  
0.4359927868163069 0.4870577341612261 0.6030162637212371  
0.5247963049921083 0.4759101902504597 0.4922503598659844  
0.5165149532910078 0.4622695138715400 0.7397885688601136  
0.4811681385400490 0.6597182155086614 0.4835481620180317  
0.4921787949299556 0.4725095246699524 0.6105066635455429  
0.4831140051750893 0.3421150399158392 0.5635409446415593

|                    |                    |                    |                    |                    |                     |
|--------------------|--------------------|--------------------|--------------------|--------------------|---------------------|
| 0.0981761494250421 | 0.2775002979539849 | 0.4844320632805363 | 0.7505500084527128 | 0.0053784521016240 | 0.0061028553721343  |
| 0.5160249503275836 | 0.6081005447958603 | 0.6232199683630668 | 0.2505688132720252 | 0.5043289046464210 | 0.4916868444801921  |
| 0.3219018741176995 | 0.0932015997135167 | 0.7366341963766274 | 0.4165386372431925 | 0.7007129429995516 | 0.9974066235626040  |
| 0.3968417498310117 | 0.2431997939263866 | 0.8244889762004206 | 0.3268762172714474 | 0.2055183364784128 | 0.7186108813469119  |
| 0.8164168580132412 | 0.5889711908179862 | 0.2291173724178890 | 0.8180640421226357 | 0.7015926630067923 | 0.1996420910914409  |
| 0.8754196137078196 | 0.7483935045883996 | 0.3301412014155147 | 0.6831595545027422 | 0.7977510494516906 | 0.7002489730770094  |
| 0.6840822253608252 | 0.9077769584768589 | 0.7550240140081002 | 0.1640423997877463 | 0.3055141304911544 | 0.2134362705655164  |
| 0.6345526437166527 | 0.7398041404499480 | 0.8352570603996128 | 0.6847288611919282 | 0.2046407545124325 | 0.3048937781559928  |
| 0.1644203752908169 | 0.4155674932226106 | 0.2682714057232545 | 0.1750978932259528 | 0.7031808063069391 | 0.7805840559116675  |
| 0.1025523054277642 | 0.2522081963142710 | 0.3229590849833599 | 0.3338023035046547 | 0.8114095829497998 | 0.2808572142393402  |
| 0.6851669466842338 | 0.0928197810950095 | 0.2694613711214942 | 0.8234841692183679 | 0.2967314802967636 | 0.8045410650492855  |
| 0.6264310706571905 | 0.2542971120661619 | 0.1791026922412300 | 0.6687095025791722 | 0.7998096495312765 | 0.2901418782446825  |
| 0.1855398868981410 | 0.5907364183920478 | 0.7588474785383426 | 0.1791944968782531 | 0.3000506248247419 | 0.8035868076553788  |
| 0.1052841338310202 | 0.7354796217069008 | 0.6698456046621644 | 0.3144470222208824 | 0.2095883206717275 | 0.3069635146653837  |
| 0.3218166120155246 | 0.9193393854474365 | 0.2161238403531058 | 0.8306022776763626 | 0.7012328407570507 | 0.7859930947995650  |
| 0.4012771884309956 | 0.7675286756554769 | 0.1858667283803399 | 0.3209008800148325 | 0.8052464198525868 | 0.6993529526814513  |
| 0.8220264894194926 | 0.4061820553512518 | 0.7474178193597112 | 0.8365164169097667 | 0.2974757215324999 | 0.2169858047047374  |
| 0.8743168406512538 | 0.2390904583499610 | 0.6736507356242640 | 0.6739271280013881 | 0.2026625397464059 | 0.7193705778551234  |
| 0.6772911895694378 | 0.9104318453016731 | 0.2458225516732639 | 0.1852548215730110 | 0.7083816354808192 | 0.1947176785355040  |
| 0.6027963977028250 | 0.7570764173108557 | 0.1781541244484401 | 0.0845107991818779 | 0.1977692083614997 | 0.5067385144140459  |
| 0.1820168290417001 | 0.4081068007137674 | 0.7390805169237069 | 0.5889706895563833 | 0.6961094025634580 | 0.9977085066584337  |
| 0.1298577871277757 | 0.2399302714650133 | 0.6709375959002841 | 0.9183350515276416 | 0.7923708275205854 | 0.4972190400966312  |
| 0.3076659855822257 | 0.0976981599664839 | 0.2856867885214299 | 0.4168352581100097 | 0.2943578686506712 | 0.012469380562076   |
| 0.3770800419339508 | 0.2479145900264541 | 0.1802761057090123 | 0.9192611004218634 | 0.1951986123271894 | 0.5109476946317670  |
| 0.8206008593709271 | 0.5891826959507114 | 0.7599184606281923 | 0.0847707716924475 | 0.7942932593857464 | 0.4921491164467184  |
| 0.8999103155192074 | 0.7362617860643184 | 0.6798519721947613 | 0.5842526861048825 | 0.2962621880283081 | 0.0100584504615640  |
| 0.3146152231866637 | 0.9113113866377205 | 0.7801919596349975 | 0.2706458702001555 | 0.0071290102390691 | 0.7966680613336692  |
| 0.3730390081767468 | 0.7444181593602863 | 0.8084330063409482 | 0.7784946587376353 | 0.4934226845309055 | 0.29246119964167405 |
| 0.8339876294473285 | 0.4076609282012546 | 0.2713716664112211 | 0.7291140358196202 | 0.0015561274894367 |                     |



|                    |                     |                     |                        |                    |                     |
|--------------------|---------------------|---------------------|------------------------|--------------------|---------------------|
| 0.8748425449529478 | 0.2379759182171099  | 0.6686317360070433  | 0.3240519212333481     | 0.8137989192970423 | 0.7021612874362546  |
| 0.6763489179442246 | 0.9093657245133357  | 0.2374878319266287  | 0.8366346499185227     | 0.2983673457211182 | 0.2087742851079142  |
| 0.6038855917117374 | 0.7537628125970670  | 0.1757031289624820  | 0.6782625035668914     | 0.2042442291849440 | 0.7159487054473601  |
| 0.1766524101206102 | 0.4165866941059164  | 0.7304393550003070  | 0.1882684533765300     | 0.7098570649692491 | 0.1980464237106787  |
| 0.1259497406641827 | 0.2468198750429167  | 0.6650039903391516  | 0.0838838469335101     | 0.2000957493036566 | 0.5001059671343313  |
| 0.3112366030309914 | 0.1009449725162526  | 0.2864528826265840  | 0.5885381818660420     | 0.6935208341348797 | 0.9948152722202934  |
| 0.3756100517262482 | 0.2538883269738434  | 0.1766508505728126  | 0.9190792740173066     | 0.7895906215958917 | 0.4951824692318993  |
| 0.8168130211143989 | 0.5898623730516164  | 0.7622503434160990  | 0.4145852519342128     | 0.2975592860757388 | 0.0043460164229714  |
| 0.8978221998588083 | 0.7347591060755008  | 0.6772564787097224  | 0.9182302162982126     | 0.1929948450862540 | 0.5044079604177156  |
| 0.3180600315219309 | 0.9211114436208234  | 0.7782407746055000  | 0.0858665207604687     | 0.7953448480196670 | 0.4928243170412188  |
| 0.3785013600947380 | 0.7539519481980150  | 0.8145498145729846  | 0.5833428000080616     | 0.2939964495692138 | 0.0048729396152751  |
| 0.8336012628205083 | 0.4067625326825279  | 0.2742584475189318  | 0.2690303645001961     | 0.0125606415909374 | 0.7965154366232312  |
| 0.8968512220022973 | 0.2433397859322213  | 0.3185140381255636  | 0.7781718841216474     | 0.4931881031625736 | 0.2888773475694535  |
| 0.6823250044061950 | 0.0918529892605022  | 0.7408851077570731  | 0.7296795262196198     | 0.0008573614279186 | 0.7948459444946110  |
| 0.6093145287767996 | 0.2441890692930073  | 0.8206145744277009  | 0.2248260683094472     | 0.4996922363565730 | 0.2872864286287395  |
| 0.1894508176993241 | 0.5965924485405623  | 0.2214837428069742  | 0.7284438634397077     | 0.9979219330501721 | 0.2103733746560295  |
| 0.1268520619782478 | 0.7524272519876689  | 0.3233568456952796  | 0.23013040994427582    | 0.5044288695407531 | 0.6999723593307721  |
| 0.3221022416615682 | 0.2469294625112184  | 0.5046424253381545  | 0.2707500710389965     | 0.0091651940705546 | 0.2064235012368840  |
| 0.1034205243105788 | 0.0906044103361552  | 0.4813291663890453  | 0.7736816033871179     | 0.4976360761734071 | 0.7014077649163255  |
| 0.8371954756525568 | 0.7256579409221260  | 0.9935466950925402  | 0.1512035804595797     | 0.9970969338802149 | 0.4980678105167371  |
| 0.6202833116375501 | 0.5884252027479349  | 0.0263861827606391  | 0.6578164713248427     | 0.4889827334399541 | 0.9994466936286983  |
| 0.6505373706296140 | 0.7904334169603402  | 0.4976872253115872  | 0.8499512189921106     | 0.9916207059970432 | 0.5030868433255264  |
| 0.8985315595420005 | 0.8994523298028483  | 0.5138280609026324  | 0.3451298762029467     | 0.4944327981387175 | 0.50017302391136198 |
| 0.1397015835464188 | 0.3061005724701266  | 0.9961005724701266  |                        |                    |                     |
| 0.4037062280458628 | 0.4094658085058640  | 0.9973331367829985  | TS6 (H11C3O74Al1Si35): |                    |                     |
| 0.6698077931322999 | 0.2281129794321259  | 0.5051897608709908  | 0.4998250188876341     | 0.6295055084284726 | 0.7386169009195243  |
| 0.9003799429372634 | 0.08244151274184958 | 0.4905438062910434  | 0.4901381815359827     | 0.6201668058295411 | 0.3559586308372218  |
| 0.1684958622701487 | 0.7336381068969331  | 0.9931050364860496  | 0.4890908642661032     | 0.7240347259756135 | 0.4875392513712882  |
| 0.3839537358862302 | 0.5907871240404248  | 0.0297764222651651  | 0.4160988289509362     | 0.6452565779639627 | 0.4956963395376448  |
| 0.3492142779980831 | 0.8209620192991309  | 0.4975077462121646  | 0.5152966215510304     | 0.4462705069519117 | 0.7221390796353120  |
| 0.0994664639656762 | 0.9073380701538980  | 0.5072466305579155  | 0.5167243537999013     | 0.4663551916553530 | 0.4768684357742288  |
| 0.8561745176276787 | 0.2938547445624593  | 0.9999694743172753  | 0.4305876868212550     | 0.4679877297568993 | 0.5992909390686449  |
| 0.5987141704788428 | 0.4058511038030588  | 0.9944877824003768  | 0.4792044400854536     | 0.3583246130148510 | 0.5687066136713881  |
| 0.2523819694090719 | 0.2650230147071468  | 0.8080357525139306  | 0.4702020223232424     | 0.2921807562333356 | 0.3661726672941299  |
| 0.7610970007314464 | 0.7582902928134132  | 0.7019232609923733  | 0.5581471290344382     | 0.3097310783141793 | 0.4676450041461422  |
| 0.7603887540320073 | 0.2485569669954444  | 0.2410332997419502  | 0.5276466365159038     | 0.2033941098011169 | 0.6700877275635406  |
| 0.2640338546108794 | 0.7539590309598339  | 0.2482469315957871  | 0.47352462788034134    | 0.6503765407174953 | 0.4828096391629062  |
| 0.7414604320073650 | 0.7444551647337718  | 0.2442639433984866  | 0.4870634475344815     | 0.4541742723237476 | 0.5972822982440888  |
| 0.2369110466815130 | 0.2554748412822150  | 0.2297053217868097  | 0.5029976741316560     | 0.2893030832538912 | 0.4853933803317645  |
| 0.2446414415964071 | 0.7682570558809019  | 0.7024495523489094  | 0.3173968840620063     | 0.0968136804929642 | 0.7310269299412866  |
| 0.7467076779114947 | 0.2559310111126365  | 0.7983823324015518  | 0.3877626792482758     | 0.2481854619846118 | 0.8301400456971919  |
| 0.006464548717346  | 0.2090034822627658  | 0.5415730107411036  | 0.8170719309202283     | 0.5835482706176336 | 0.2182318708680242  |
| 0.5067141271165099 | 0.6860850098156916  | 0.9475856280308932  | 0.8786388588534209     | 0.7406082102532991 | 0.3232045531379057  |
| 0.0022014578232543 | 0.7785013745858578  | 0.4623180753881542  | 0.6836425551412546     | 0.9025661190434420 | 0.7528933467863510  |
| 0.4992899341533672 | 0.2771931164829695  | 0.0233437349102701  | 0.6341582868845279     | 0.7338780180449831 | 0.8304739107093795  |
| 0.1970653977316132 | 0.0032561652980334  | 0.6801795010432770  | 0.1642232520903733     | 0.4174609625677448 | 0.2767594885802538  |
| 0.7095679028972128 | 0.4681582592042588  | 0.1674258225478482  | 0.1011775031456565     | 0.2539348029356532 | 0.3226332545333932  |
| 0.8020096275444573 | 0.9997949373187325  | 0.6813016513743122  | 0.6850961148553338     | 0.0863660591917395 | 0.2659177357404587  |
| 0.2914088338566572 | 0.4700407440834624  | 0.1646527773287616  | 0.6222458091146308     | 0.2442419603604051 | 0.1726635508090979  |
| 0.7998155302888463 | 0.9860166688806515  | 0.3272502252857450  | 0.1877894165754199     | 0.5949914377066605 | 0.7619354239589811  |
| 0.3026075097024545 | 0.4888181182213316  | 0.8118059279924381  | 0.1074329900257993     | 0.7401343557337015 | 0.6735022421427459  |
| 0.2005982661610162 | 0.9882246500305243  | 0.3232331792299732  | 0.3214941598136818     | 0.9222610918034349 | 0.2162508944508161  |
| 0.7008569975552490 | 0.4865795900294145  | 0.8130035402472444  | 0.4030820404558710     | 0.7721112413821274 | 0.1864559826786092  |
| 0.2473090324971494 | 0.0303898735970378  | 0.0024171622961973  | 0.8221142614109027     | 0.4019930899847566 | 0.7344393895253205  |
| 0.7525341701892998 | 0.5048420599820105  | 0.4929650728802102  | 0.8691767222846778     | 0.2317753170402526 | 0.6626723308971734  |
| 0.7503739512027039 | 0.0072798552266917  | 0.0034325425851733  | 0.6770293069287234     | 0.9040389467306085 | 0.2370068504092799  |
| 0.2514843250853218 | 0.5100352237386616  | 0.4916508733798111  | 0.6048909968403819     | 0.7482271389088453 | 0.1744572836675289  |
| 0.5092992387657418 | 0.5807759811909250  | 0.6351521711101711  | 0.1796825787329368     | 0.4127515626602616 | 0.7358637377461292  |
| 0.4664509407451760 | 0.1928218548625225  | 0.4844895093969868  | 0.1218132989300358     | 0.2471736527299413 | 0.6736198478753934  |
| 0.4166921861836101 | 0.7031753445616715  | 0.9998334926034573  | 0.3084744954536589     | 0.1012830620189220 | 0.2847159560088031  |
| 0.3188091442733167 | 0.210665698970684   | 0.7117698033907942  | 0.3772416972773271     | 0.2538436656649949 | 0.1875255536595972  |
| 0.8182185933192656 | 0.7010822251002722  | 0.19788642780361554 | 0.8204795338132840     | 0.5848779975606959 | 0.7552956867019347  |
| 0.6809852639309923 | 0.7988336336647706  | 0.6984936451154837  | 0.8999137400706019     | 0.7312966298900676 | 0.6742841696343547  |
| 0.1616164147162920 | 0.3083161880396759  | 0.2045966598472546  | 0.3155517884682695     | 0.9154118972899923 | 0.7831152821276390  |
| 0.6855424338502729 | 0.2041757386862884  | 0.2967750180218118  | 0.3774103482680431     | 0.7487545475206261 | 0.8101432579141985  |
| 0.1788517788110511 | 0.7109185843428705  | 0.7839924756749141  | 0.8328454014221691     | 0.4022246538198857 | 0.2660034426283246  |
| 0.3362364296363722 | 0.8144845101969622  | 0.2852033453265292  | 0.8959486915227686     | 0.2390155549778896 | 0.3146995511600679  |
| 0.8262854234214174 | 0.2990540889908715  | 0.7988917608516743  | 0.6820661273871806     | 0.0857491499373424 | 0.7404438452659150  |
| 0.6684279724405968 | 0.7990570046354009  | 0.2880400680247064  | 0.6037191854048487     | 0.2336476964460559 | 0.8165949100675363  |
| 0.1732519565954433 | 0.3091167758377011  | 0.7986525613278133  | 0.1877640272805507     | 0.5975599765386619 | 0.2274905495474897  |
| 0.3114899404158393 | 0.2140054448571647  | 0.2986501588977220  | 0.1282620059970796     | 0.7566187361732233 | 0.3211116304275237  |
| 0.8281779148289630 | 0.7019228428111788  | 0.7844037234152950  | 0.3283312787797072     | 0.2412391912569589 | 0.5117128178158552  |

0.1011138735788393 0.0904745857545990 0.4885154521053607  
0.8391731527378496 0.7202536358123339 0.9899614840604585  
0.6154748292663612 0.5821094627514398 0.0232711654831519  
0.6521766468960735 0.7835706426722595 0.4957033746685866  
0.8982541283833712 0.8955810582366794 0.5108768386126954  
0.1420388319661470 0.3032112921157761 0.0030946122240110  
0.4027933844488061 0.4093701893282500 0.0041027960870323  
0.6648942768990693 0.2206480957702084 0.5029490085845012  
0.9013666681032149 0.0782448706155776 0.4875964297795363  
0.1676508788653592 0.7316816759444293 0.9909042419632073  
0.3846301225676285 0.5907959208622202 0.0380727252556312  
0.3478968945271035 0.8194726063890769 0.4959879045097821  
0.0985787530929727 0.9071379235181283 0.5134845208961423  
0.8519681134986925 0.2849111903452695 0.9965788743397539  
0.6017977412746021 0.3992018339210830 0.9810244535045953  
0.2507528099856415 0.2563871820584822 0.8050567165211859  
0.7628465254426047 0.7523727487255698 0.6987435605608141  
0.7588351248178355 0.2445404860326192 0.2482848574266399  
0.2648690099487752 0.7526360386317918 0.2415774294920823  
0.7425673115728628 0.7398058182085663 0.2388348500199911  
0.2382173664005691 0.2601385591203780 0.2458290831081200  
0.2438119118275637 0.7630243034102691 0.6977684732092371  
0.7412283978149077 0.2540706140115816 0.7954726988416709  
0.9981011711332144 0.2094584266401327 0.5433340246637321  
0.5063701242657004 0.68839858584836481 0.9439717182510350  
0.0028885620063619 0.7770986971681779 0.4565644603367360  
0.4987202598948315 0.2773826573164868 0.0279849072342699  
0.1980857735501758 0.0036552436745865 0.6774427690070439  
0.7087777248406795 0.4664841594819791 0.1638318721021648  
0.8024901443620180 0.9966209962738617 0.67910748114113074  
0.2889831150196898 0.4711164396373277 0.1635476312384228  
0.7998948608362824 0.9829980387040536 0.3252822007328291  
0.3043637986075325 0.4908711234005949 0.8125198281607595  
0.1970440201299937 0.9896482933619239 0.3212759492263686  
0.7014743556535379 0.4890194962327286 0.8094672318735121  
0.2451748415619122 0.028607784357531 0.0017181788735883  
0.7533637191654847 0.50064276674401868 0.4890738288704668  
0.7508967229413912 0.0012944131512853 0.0012363914472076  
0.2513510904291110 0.5084027589332081 0.4935304296276470  
0.5093407389776274 0.5994995733851454 0.6211228081563576  
0.4919995453837700 0.2092804497666023 0.5749841489949006  
0.4162983998715220 0.7031903122599772 0.9994464690568492  
0.3203730922181549 0.2094696044476478 0.7178576904968992  
0.8194867766461797 0.6965716301822980 0.1941946129084613  
0.6825954133142389 0.7924736435222783 0.6963531656136226  
0.1617685822248873 0.3088251668631727 0.2124553058367411  
0.6836698921816264 0.1983403683227039 0.2956358793600344  
0.1777560834905785 0.7075526977027806 0.7822251771997912  
0.3356748385496502 0.8151082879672060 0.2831711168486422  
0.8222338731027037 0.2934178695252641 0.7958991487456331  
0.6695056060943827 0.7935889316375437 0.2860562499879649  
0.1734869722414132 0.3054824589388971 0.8034668669822480  
0.3121403286216236 0.2135154664983645 0.3058456312983822  
0.8305002828269892 0.6970498013369379 0.7805615777040700  
0.3228119762470811 0.8098233835947681 0.7003156285132661  
0.8347629258694482 0.2929135265251404 0.2064132411341788  
0.6751338686474710 0.1972800851042535 0.7127368634068034  
0.1881616708427032 0.7102519987240967 0.1964148900877944  
0.0818248909187389 0.2001300417908070 0.5060558804221316  
0.5882766483120889 0.6896876323295871 0.9925645273902148  
0.9198714822913772 0.7862556628430966 0.4915094365497552  
0.4140141710880130 0.2976670419692837 0.0119789338652438  
0.9164419660764835 0.1895015227979471 0.5021015601416750  
0.0860830419928149 0.7952014535383043 0.4920917982608728  
0.5824820167205758 0.2892192705474272 0.0020646701875009  
0.2691247083908408 0.0092656748339621 0.7979104757966269  
0.7782074500295835 0.4892711302905468 0.2842103470090649  
0.7302112602638999 0.9951859973444712 0.7927724259194164  
0.2233697779020929 0.5002654511205051 0.2897844599848369  
0.7285096470193935 0.9929120015971904 0.2079902915089633  
0.2308734205552625 0.5025009635792586 0.7024700722926553  
0.2679976863592088 0.0092588070299655 0.2065020822374777

0.7745244662334940 0.4945268784960248 0.6976805249151354  
0.1497416225656778 0.9974161580603109 0.4999987125375327  
0.6575968420878056 0.4860529873627684 0.9942672166274633  
0.8502275635296925 0.9880790867909042 0.5005985247622817  
0.3450001502947515 0.4952757350131449 0.0055586903155032

P1(H13C4O74A11Si35):

0.5066978588465787 0.7790524434497499 0.7056172931882330  
0.5086391978090248 0.8750729131070969 0.3745126489651511  
0.5346978493463510 0.9332205341993500 0.5746762060294088  
0.4462551788249201 0.89138545373583109 0.5477637358142786  
0.5514550951540755 0.6216468596984157 0.4292955629254962  
0.4567324621022664 0.6240945783276501 0.4130207682402727  
0.4988774416190438 0.6039916943750043 0.6271349836434297  
0.5619544892714003 0.3716625799256477 0.4582796307929726  
0.5678318471998196 0.4467156630986722 0.6513505991616597  
0.6104922751180979 0.4796300343128337 0.4458539782922131  
0.3927672352331868 0.4832090422826738 0.5071028373784685  
0.4388460000756069 0.3735651536002678 0.4580137657735790  
0.4360034683896075 0.4484710142976809 0.6523349776655252  
0.5019389666253957 0.8765503417361558 0.5189489234514255  
0.5021733130137775 0.5949394339512750 0.4832860896486721  
0.5658466707225571 0.4436797037472360 0.5061161281389701  
0.4367841438819653 0.4454563680720298 0.5071028373784685  
0.3300771401784459 0.0551501670751477 0.7438195740074818  
0.4066691229314330 0.2004204232408284 0.8366160472116277  
0.8250984834013835 0.5615764377854262 0.2537629600377471  
0.8806405500782830 0.7251521795283864 0.3369088120704333  
0.6918924085365106 0.8767885946085272 0.7299764242861997  
0.6445495905178262 0.7097025925266537 0.8319566218334842  
0.1834359803068324 0.3826176044509637 0.2526276941825287  
0.1136402745556921 0.2275010215022135 0.3321021728599973  
0.6891629140371691 0.0622904248521436 0.2471142344288708  
0.6316413914004428 0.2277510901585913 0.1763813734982733  
0.1750884109099431 0.5556288288030231 0.7294740271962468  
0.1038693868710538 0.7128081953714940 0.6767530250442988  
0.3314636790838819 0.8841148125722924 0.2546316194724270  
0.4004062249035414 0.7254497001589115 0.1904825710636757  
0.8260459316905582 0.3780046167382736 0.7687258735313591  
0.8828049778560541 0.2157577572973253 0.6785848626067548  
0.6877598422612508 0.8791325016228342 0.2655844548116590  
0.6154317155009323 0.7257746798508364 0.1808676863942651  
0.1880633426004457 0.3734062290500546 0.7576207347697874  
0.1356823193541317 0.2067697842251164 0.6807832350716652  
0.3278673274413819 0.0665530717270286 0.2556278673908494  
0.3871605775356954 0.2302298443674999 0.18772266502025925  
0.8356174452957248 0.5609647210085740 0.7392843010808434  
0.9130453780323222 0.7124767520437914 0.6808210125747749  
0.3160638869555186 0.8747329770270937 0.7385756529826253  
0.3798085778562523 0.7138179718872237 0.8074879376905102  
0.8321748661537782 0.3788366939663135 0.2540915806562367  
0.9029219949670590 0.2237978218601242 0.3278875523756213  
0.6818134251933330 0.0589813875006442 0.7631316176693588  
0.6099221983051351 0.2139934963081132 0.8243126680567414  
0.1999602191605518 0.5646369248265231 0.2533715522837880  
0.1322975489605867 0.7196277366925088 0.3299765803561030  
0.3544339854301697 0.1905908273990775 0.5131918222669185  
0.1046626969204638 0.0593208256207802 0.4824405412469517  
0.8642391071544253 0.6780646444503375 0.0009890496727110  
0.6111339023983859 0.5615657886477976 0.0205277352906563  
0.6802677524271488 0.7379380336837116 0.4937603339270922  
0.9011237893921020 0.8784437483082144 0.5244237446263043  
0.1649878776113027 0.2494545366449898 0.0116233171358502  
0.3963644535557123 0.3714371149035429 0.9611897927355102  
0.6589934400925657 0.1823016370996413 0.5054847878230362  
0.9090482359428762 0.0609713310828539 0.4966268215789000  
0.1496399773321215 0.6709155851573243 0.9972350560628414  
0.4094771985261758 0.55130206655887715 0.0141579623294366  
0.3286322993369950 0.7456095285605215 0.4877054416199087  
0.1144401810296287 0.8767617549823754 0.5097625041176670  
0.8469593672174227 0.2466469182734556 0.0102021834390484  
0.6145078762007117 0.3797756925177396 0.9787772330873139

|                    |                     |                     |                    |                    |                    |
|--------------------|---------------------|---------------------|--------------------|--------------------|--------------------|
| 0.2693066511953575 | 0.2226956392386015  | 0.7873535175230657  | 0.4629291048508719 | 0.2793161032208147 | 0.5501724599864914 |
| 0.7772987856016655 | 0.7313640176304759  | 0.7412702621973111  | 0.4719941494057451 | 0.3573041169151594 | 0.3637492281693113 |
| 0.7643956235976077 | 0.2176628561375722  | 0.2895429557333102  | 0.4416023610675452 | 0.4014070826512679 | 0.5750831464029247 |
| 0.2594990682395917 | 0.7298883789781243  | 0.1834397187874899  | 0.4753297973981319 | 0.6729208025999824 | 0.4545274210906669 |
| 0.7531817055845380 | 0.7184238702659371  | 0.1949071725801232  | 0.5753356237482876 | 0.4610371521668171 | 0.5051730685927325 |
| 0.2519087890001259 | 0.2216965301488187  | 0.2848945769182691  | 0.4750736348297053 | 0.3503649491030387 | 0.5079034389520203 |
| 0.2404122383522846 | 0.7206349918078629  | 0.7474787833319354  | 0.3053486534415768 | 0.0758317093671721 | 0.7398980147843019 |
| 0.7474278895024824 | 0.2246014998279549  | 0.7687220741429073  | 0.3876167353221760 | 0.2171015492904971 | 0.8253311289909391 |
| 0.0085251710050329 | 0.1883340641179814  | 0.5459811452418535  | 0.8086820244981254 | 0.5994984858201420 | 0.2383189212019658 |
| 0.5139132313384991 | 0.6900166591707162  | 0.9454713098778171  | 0.8776990366791537 | 0.7490889986952070 | 0.3397192571184746 |
| 0.0074917205241221 | 0.7660774277498206  | 0.4456657990662691  | 0.6821763444296849 | 0.9222869524619597 | 0.7917961111937331 |
| 0.5078573623367504 | 0.2673081792257648  | 0.0407101198669793  | 0.6179611353358894 | 0.7633841106814572 | 0.8447153073075668 |
| 0.2030772336958009 | 0.9842898709010015  | 0.6859095142085252  | 0.1762536947308817 | 0.3988279850620344 | 0.2376550781458420 |
| 0.7086799719691612 | 0.4613065615827310  | 0.1856147755519189  | 0.1195314470745359 | 0.2350198555089946 | 0.3198660398080548 |
| 0.8053713307915018 | 0.9851725224072965  | 0.6787910239629511  | 0.6675393548868698 | 0.1089442107045642 | 0.2779558432796989 |
| 0.3114327550598901 | 0.4540801252065805  | 0.1904425155420384  | 0.6022341281253887 | 0.2720023626029615 | 0.2031680304540018 |
| 0.8083568188308377 | 0.9703147989867205  | 0.3242670894567965  | 0.1608706719395911 | 0.5780572440697966 | 0.7117342912129558 |
| 0.2971321134237712 | 0.48365300440898287 | 0.84195673938941199 | 0.1063692852447247 | 0.7479478420754617 | 0.6723793947000800 |
| 0.2106558101839013 | 0.9717053025274822  | 0.3299884350839264  | 0.3119769402071171 | 0.9033139587375416 | 0.2602682754101551 |
| 0.7129024580591263 | 0.4840724633943765  | 0.8309131862205987  | 0.3689592053159103 | 0.7400614498770324 | 0.1743309371121455 |
| 0.2585797942578481 | 0.9740551714368095  | 0.0038485830833181  | 0.8279060597091998 | 0.4197939982877585 | 0.7644981068051280 |
| 0.7587978610450037 | 0.4653413154440926  | 0.5063705628369988  | 0.8934832012063296 | 0.2597961350205082 | 0.6932471371914986 |
| 0.7555629720376444 | 0.9629390331172232  | 0.0012777233150487  | 0.6757934960243261 | 0.9252731633524007 | 0.2428001505011181 |
| 0.2594521409353661 | 0.46323657058587156 | 0.5087800986857332  | 0.6043524101772064 | 0.7678674572793582 | 0.1948381145012377 |
| 0.5235571857249397 | 0.7871461476277375  | 0.5844111363109050  | 0.1655238993147066 | 0.3941542948887147 | 0.7422521896891894 |
| 0.5017097858848203 | 0.4918189597031244  | 0.4437980105583250  | 0.1173249980117319 | 0.2238747371508012 | 0.6757283848356508 |
| 0.4244390587663460 | 0.6714978821558830  | 0.9918963640588672  | 0.3240242547376795 | 0.0846576289385865 | 0.2148151751936140 |
| 0.3388502719587336 | 0.1666293144953812  | 0.7198349795603534  | 0.3930107115951458 | 0.2436198658208895 | 0.1800875397327175 |
| 0.8309503571183825 | 0.6711000437651222  | 0.1979057561456656  | 0.8183413406893436 | 0.6029097484978645 | 0.7720267389051827 |
| 0.6967492213222926 | 0.7641054876691058  | 0.7000200423278216  | 0.8872533870738855 | 0.7590120089997825 | 0.6953891644362997 |
| 0.1787767434863525 | 0.2704011919301337  | 0.2200026386761991  | 0.3001507185526791 | 0.8936762359595605 | 0.7374406566215299 |
| 0.6864203463194869 | 0.1717931500884973  | 0.3026760195444993  | 0.3789843550942962 | 0.7422819608710114 | 0.7920634302644487 |
| 0.1683221592871078 | 0.6653078360008990  | 0.7876894511885411  | 0.8247624276867995 | 0.4166050442374782 | 0.2646891132128459 |
| 0.3317961438076082 | 0.7701730538470954  | 0.2780396886343652  | 0.8772704647097598 | 0.2503649858210650 | 0.3391795567078333 |
| 0.8260417546786982 | 0.2659723551431412  | 0.8049643272118274  | 0.6823574573599487 | 0.1030903819150595 | 0.7336304147475090 |
| 0.6839295151669376 | 0.7659433817640391  | 0.2853999667797140  | 0.6256596384034978 | 0.2595502872229360 | 0.8584279396132359 |
| 0.1895502569719270 | 0.2632201952598052  | 0.8077737761434634  | 0.1863768449285743 | 0.5816603815009245 | 0.2521084527002273 |
| 0.3296058225866858 | 0.1761681214202895  | 0.3083584351265216  | 0.0993178621152069 | 0.7208256373138724 | 0.3210944679331220 |
| 0.8468556812595764 | 0.6707369900554951  | 0.7907796858232956  | 0.3495640345159714 | 0.1944672401878549 | 0.4953965373840816 |
| 0.3179874193803016 | 0.7621428235705636  | 0.6990394176165822  | 0.0866456685643371 | 0.0746956315356258 | 0.4812250275962953 |
| 0.8365749169098819 | 0.2666893142466265  | 0.2198330099970676  | 0.8286725949520246 | 0.7376933060475679 | 0.0114811201128404 |
| 0.6756322717784968 | 0.1691441859731029  | 0.7153666456860464  | 0.6189378115761528 | 0.6074345318880958 | 0.0269991285724984 |
| 0.1863120977392896 | 0.7685242945470208  | 0.1920591636300273  | 0.6464356770589532 | 0.8183590740427320 | 0.5157085212110388 |
| 0.0914515501388067 | 0.1703632733900733  | 0.5098431165662447  | 0.8856743386276591 | 0.9133512528065779 | 0.4966593324627127 |
| 0.5945115188731265 | 0.6735856700043925  | 0.9932962856495422  | 0.1629230581235532 | 0.2644821582991952 | 0.9949367234532218 |
| 0.9256291704366078 | 0.7707146749956308  | 0.4979713025200425  | 0.3784412963948185 | 0.3876840572207030 | 0.9558743419979336 |
| 0.4233788911788139 | 0.2671768654455917  | 0.0064334128165839  | 0.6449557471038716 | 0.2425705880701940 | 0.5188919922617714 |
| 0.9255817844837395 | 0.1719325884069320  | 0.5119980712861434  | 0.8980805406380767 | 0.0961661937569147 | 0.5226159033963640 |
| 0.0907849496666060 | 0.7685242945470208  | 0.4916037110517877  | 0.1329163303161636 | 0.6830518422027581 | 0.9914860102877512 |
| 0.5914283975907324 | 0.2712660020357305  | 0.0049662730330624  | 0.3930567974125054 | 0.5700694241210442 | 0.9841803243559255 |
| 0.2767329491693857 | 0.9700061893169050  | 0.7939703562182814  | 0.3086616725614633 | 0.7636017469116396 | 0.4890777254255383 |
| 0.7819177537304753 | 0.4673540177095177  | 0.2989515154882127  | 0.1118221552197838 | 0.8927666031435777 | 0.4477896842927365 |
| 0.7339810991213369 | 0.9699515536517396  | 0.7931749230261858  | 0.8369735042687623 | 0.2876425041526218 | 0.0110866637238090 |
| 0.2380836726856259 | 0.4670128828106925  | 0.2994472313829277  | 0.5945435358232416 | 0.4245946765517346 | 0.0007204361296473 |
| 0.7355389516098825 | 0.9684627684801015  | 0.2100551793074601  | 0.2545245935006974 | 0.2508714605000861 | 0.7305610599144998 |
| 0.2299645642471333 | 0.6943385595054451  | 0.7113805288792818  | 0.7491448712447379 | 0.7622354787852359 | 0.7235690683941840 |
| 0.2819292768517840 | 0.9728956686298531  | 0.2111749693906972  | 0.7414440927063239 | 0.2670755953340205 | 0.2624132072708605 |
| 0.7839310871218998 | 0.4721311099499204  | 0.7126093906202229  | 0.2285239300506916 | 0.7588050147995631 | 0.2052708587409882 |
| 0.1591969788196721 | 0.9723754148525074  | 0.5015379624936926  | 0.7404288443687363 | 0.7611021957337556 | 0.2791724727093836 |
| 0.6627039150302210 | 0.4726269640396623  | 0.0039352706055809  | 0.2563176021506379 | 0.2474715106965206 | 0.2541325025168106 |
| 0.8555507977377488 | 0.9730449168679272  | 0.5055211634738086  | 0.2392188561288862 | 0.7288566294878507 | 0.7827284906576040 |
| 0.3539609595360318 | 0.4686088853970318  | 0.0030309493649909  | 0.7557594165835297 | 0.2623176631571411 | 0.7274767076355673 |
|                    |                     |                     | 0.0004116657427318 | 0.2196576155240422 | 0.4870357080727672 |
|                    |                     |                     | 0.4998281124849981 | 0.7040579076430191 | 0.9887932301653777 |
|                    |                     |                     | 0.9949750529600863 | 0.8001368647939557 | 0.4934291932713748 |
|                    |                     |                     | 0.4976211337496466 | 0.2927578041444932 | 0.9750902449390111 |
|                    |                     |                     | 0.1819525456292226 | 0.9929701720238313 | 0.6857472486034055 |
|                    |                     |                     | 0.6987717620980689 | 0.4860394419393970 | 0.1955730968154583 |
|                    |                     |                     | 0.8025342229605528 | 0.0084213340958996 | 0.7105076283079299 |
|                    |                     |                     | 0.3024603349485915 | 0.4782916777901178 | 0.1916579372983804 |
|                    |                     |                     | 0.7875299493707431 | 0.0232052467327009 | 0.3575889550872660 |
|                    |                     |                     | 0.2751729136739982 | 0.4959833782146319 | 0.8475255372296786 |

P2(H11C3O74A11Si35):

|                    |                    |                    |
|--------------------|--------------------|--------------------|
| 0.4986614081686227 | 0.6799781613980329 | 0.7092212185700006 |
| 0.4973486519037920 | 0.6364876204791017 | 0.3389050193268943 |
| 0.4777265857239783 | 0.7482947243453779 | 0.4283326102196199 |
| 0.4199966601232674 | 0.6523564935361250 | 0.4703150068635082 |
| 0.5449413769244060 | 0.5162581791344110 | 0.5715322085922452 |
| 0.6305937462900673 | 0.4629648608945658 | 0.5458748375165925 |
| 0.5698457382139850 | 0.4638273508765280 | 0.3607514987746185 |
| 0.5821337895173357 | 0.3171558451525627 | 0.5362816104222148 |

|                    |                    |                    |                    |                     |                    |
|--------------------|--------------------|--------------------|--------------------|---------------------|--------------------|
| 0.2046716844966170 | 0.0179495451293832 | 0.3373337981107909 | 0.3986583882832164 | 0.7691695462502324  | 0.1819812682701070 |
| 0.7041387682285105 | 0.4976957126739094 | 0.8381028856096435 | 0.8204948046537126 | 0.4054338529785966  | 0.7500826115854480 |
| 0.2392638005105425 | 0.9887955680568297 | 0.0020620927535333 | 0.8728318552025556 | 0.2387024406830633  | 0.6756969130702331 |
| 0.7536586054399308 | 0.5076217344147977 | 0.5144926354917772 | 0.6797074771350253 | 0.9108085977700841  | 0.2489131854075310 |
| 0.7451476746952252 | 0.036663711260225  | 0.0229687724835017 | 0.6043005952981488 | 0.75908966281900713 | 0.1771669147593258 |
| 0.2459237678862181 | 0.4788178180125797 | 0.5055740204764660 | 0.1801344548516894 | 0.4093001128220166  | 0.7411023623406265 |
| 0.5172966206151628 | 0.6474538460404133 | 0.6051462099805462 | 0.1300825648057327 | 0.2404107195709386  | 0.6671198600230781 |
| 0.5477467474755358 | 0.3700097915992444 | 0.5663859987293449 | 0.3039569994946518 | 0.0945786290910462  | 0.2833706130212121 |
| 0.4081335743480210 | 0.6904840812653532 | 0.9889465521524130 | 0.3760740446968001 | 0.2419019300360148  | 0.1718329968277246 |
| 0.3223244260591258 | 0.1837355656070514 | 0.6989500788799319 | 0.8197033659843811 | 0.5882631796934135  | 0.7614934086465652 |
| 0.8134999454939589 | 0.7126137566568431 | 0.2175223159615527 | 0.8995551418964354 | 0.7344300320928170  | 0.6799679401920571 |
| 0.6732764203879356 | 0.8152925404559213 | 0.7197253445240719 | 0.3152902532607484 | 0.9130764397736186  | 0.7792427790913692 |
| 0.1786927238625893 | 0.2869681025799409 | 0.2019827123706932 | 0.3755986171470269 | 0.7453454917203715  | 0.8069760855845871 |
| 0.6662501654430315 | 0.2206494908620584 | 0.3088285605928789 | 0.8347513980184829 | 0.4077125227941423  | 0.2719145782225709 |
| 0.1609308068821989 | 0.6850448513172367 | 0.7882813077496209 | 0.8973815002697521 | 0.2447111869303669  | 0.3258850058995577 |
| 0.3068295130335272 | 0.7891356633989375 | 0.2794384537933823 | 0.6761029488851520 | 0.0901386172197007  | 0.7539280601918392 |
| 0.8294897704523549 | 0.3078665697364400 | 0.8005360013246730 | 0.6038459321940763 | 0.2443189484771793  | 0.8275571340216885 |
| 0.6665112293641471 | 0.8170076628583729 | 0.3071796942573144 | 0.1791173480064501 | 0.5949279299670565  | 0.2351737379924046 |
| 0.1752117995124465 | 0.2838780097768918 | 0.7858159255726704 | 0.1241721425836246 | 0.7585959445775572  | 0.3192371700931176 |
| 0.3291888565447891 | 0.1912404656266986 | 0.2857473406985775 | 0.3404094304095082 | 0.2305413289156277  | 0.5041618755257531 |
| 0.8207919689383019 | 0.7158085362182405 | 0.8013266289359677 | 0.0963537023440963 | 0.0860589675348962  | 0.4910591514333476 |
| 0.3089237840235057 | 0.7811262010520466 | 0.7017490173004575 | 0.8403660800727053 | 0.7223539709883156  | 0.9968287791082417 |
| 0.8208352803288648 | 0.3055210726715387 | 0.2193611678482199 | 0.6179696559521375 | 0.5907462591104249  | 0.0379801535898565 |
| 0.6788238449807480 | 0.2151488331560074 | 0.7159208134602508 | 0.6532873245588107 | 0.7875580628622885  | 0.5004306088934527 |
| 0.1632746077551346 | 0.6863906925185574 | 0.1931063060642231 | 0.8951089574943225 | 0.9014831822792999  | 0.5262733910162751 |
| 0.0823560545795203 | 0.1881181037553574 | 0.4908565983767872 | 0.1501112880367472 | 0.2903611367868777  | 0.0012799531274581 |
| 0.5820975397528088 | 0.7112236793263662 | 0.0138462212161201 | 0.3969074502275589 | 0.4050094848225285  | 0.0092542438402035 |
| 0.9112659747022249 | 0.8052502695262262 | 0.5073207918004101 | 0.6605488940689170 | 0.2232881786852090  | 0.5119457357058224 |
| 0.4119313105818918 | 0.2860851010311194 | 0.9855329901522154 | 0.9035841588756597 | 0.0838661791969386  | 0.5003652481664815 |
| 0.9172127926061577 | 0.206339989383067  | 0.5111405346216600 | 0.1629789016841841 | 0.7263864545329710  | 0.9909491028306362 |
| 0.0795409266421743 | 0.7896398616310520 | 0.4842835196938680 | 0.3853532931882953 | 0.5879050423719860  | 0.0329452744000491 |
| 0.5794946693096179 | 0.3130887831956812 | 0.0083614723776080 | 0.3431265343648704 | 0.8159801845889589  | 0.4925798341149203 |
| 0.2569128708408712 | 0.9858773727261934 | 0.7916525549057667 | 0.1036894367923580 | 0.9039316950076284  | 0.5328372711133653 |
| 0.7720457194766723 | 0.5039779352345946 | 0.3038580460320759 | 0.8494275382870029 | 0.2854579332424478  | 0.0084766156820777 |
| 0.7283449177167753 | 0.0159331275155381 | 0.8150854946139177 | 0.5997245882147553 | 0.4083076653153626  | 0.9966860832582256 |
| 0.2277879181439459 | 0.4856966611704649 | 0.2952116616951272 | 0.2594365731859156 | 0.2590549920101992  | 0.7943893746275634 |
| 0.7196026396177118 | 0.0213561169713898 | 0.2265958016253435 | 0.7630284468231991 | 0.756875423629858   | 0.7071895707499891 |
| 0.2124869495998709 | 0.4875599881446320 | 0.7031109270157216 | 0.7595184640740769 | 0.2509699835024151  | 0.2714430048635634 |
| 0.2697144837917591 | 0.9960358249535304 | 0.2032996567254983 | 0.2608721775497003 | 0.7450408671869226  | 0.2413786490398380 |
| 0.7763986064652855 | 0.5081389149927986 | 0.7232009572687943 | 0.7415605400154206 | 0.7441281559381920  | 0.2390325690960609 |
| 0.1468143920223000 | 0.9932934079588804 | 0.4884359807542396 | 0.2406369567595590 | 0.2610009135926532  | 0.2645463847821148 |
| 0.6543282408326832 | 0.5065922481445497 | 0.0135963226453839 | 0.2407607980454429 | 0.7625205764702159  | 0.7031840954948976 |
| 0.8433724593273766 | 0.0097135422927909 | 0.5206795760535243 | 0.7418914323323378 | 0.2536675082759743  | 0.7961604388552100 |
| 0.3382150272928115 | 0.4872190388098616 | 0.9945935395389114 | 0.0006345552933382 | 0.2150566100457780  | 0.5519241002752366 |
|                    |                    |                    | 0.5068645793348026 | 0.6928692274683002  | 0.9502821842704989 |
|                    |                    |                    | 0.0008282786411664 | 0.7857077898424265  | 0.4628998374499034 |
|                    |                    |                    | 0.4999281057936500 | 0.2826282561679037  | 0.0436523704821710 |
|                    |                    |                    | 0.2053217099259872 | 0.0137173208440728  | 0.6575540460740115 |
|                    |                    |                    | 0.7105658436166209 | 0.4715097684095255  | 0.1694453534541296 |
|                    |                    |                    | 0.7986007115417451 | 0.0085260482087861  | 0.6794850939803183 |
|                    |                    |                    | 0.2835981652579633 | 0.4751780065055797  | 0.1536302781273449 |
|                    |                    |                    | 0.8028902053756539 | 0.9928587353948473  | 0.3262745264970874 |
|                    |                    |                    | 0.3051630432203751 | 0.4885412291900550  | 0.8041871437506956 |
|                    |                    |                    | 0.1894392834672445 | 0.9885693847841921  | 0.3074798848842661 |
|                    |                    |                    | 0.6997607422862870 | 0.4942188626375810  | 0.712047386110677  |
|                    |                    |                    | 0.2427427423758459 | 0.0267965742289746  | 0.9935045292410720 |
|                    |                    |                    | 0.7534282166837087 | 0.5008490320673360  | 0.4977241175245055 |
|                    |                    |                    | 0.7509113889461929 | 0.0060448204440817  | 0.0051852736767728 |
|                    |                    |                    | 0.2479466581222667 | 0.5019551407144363  | 0.4885223754350747 |
|                    |                    |                    | 0.4164711357540583 | 0.7011831667644515  | 0.9957738138597350 |
|                    |                    |                    | 0.3270208506606167 | 0.2060741783530275  | 0.7139507944154815 |
|                    |                    |                    | 0.8190838827641613 | 0.7014708212318820  | 0.2011208212318820 |
|                    |                    |                    | 0.6827271992694364 | 0.7970319634297454  | 0.7017576471868949 |
|                    |                    |                    | 0.1631559729934793 | 0.3036193664145230  | 0.2126269986934659 |
|                    |                    |                    | 0.6832847215595947 | 0.2043943932067123  | 0.3075156033876425 |
|                    |                    |                    | 0.1753895127429672 | 0.7037276764772642  | 0.7825574059592029 |
|                    |                    |                    | 0.3311080375395150 | 0.8092494356754045  | 0.2801320424415010 |
|                    |                    |                    | 0.8214870830818626 | 0.2960305497808378  | 0.8062874482250422 |
|                    |                    |                    | 0.6698651045842468 | 0.7999593255613391  | 0.2910500230382524 |
|                    |                    |                    | 0.1787359223835665 | 0.3007331608771224  | 0.8002578402021143 |
|                    |                    |                    | 0.3129115454700226 | 0.2056919848568128  | 0.3013796768910382 |
|                    |                    |                    | 0.8302069409821513 | 0.7002046404175104  | 0.7874841578351663 |

P3(H9C2O74Al1Si35):

|                    |                    |                    |
|--------------------|--------------------|--------------------|
| 0.5076763531600292 | 0.6291027856933908 | 0.7250622816482348 |
| 0.5009918505586697 | 0.6105627583980393 | 0.3478550916332992 |
| 0.5044443193418715 | 0.7174898968913439 | 0.4684129660345420 |
| 0.4272108295174348 | 0.6465290877672700 | 0.4779520043423702 |
| 0.4365285982632869 | 0.4466461270421505 | 0.5868293104375510 |
| 0.5125117437595037 | 0.4318729693313088 | 0.4434834955618925 |
| 0.5223555756276355 | 0.4199483768606243 | 0.6794577480944994 |
| 0.4402944276055791 | 0.2928791111646447 | 0.4561105450538037 |
| 0.4485963149940139 | 0.2832095931497065 | 0.6652747503376872 |
| 0.4851347817863569 | 0.6451915925846308 | 0.4715764109834808 |
| 0.4869252136047564 | 0.4114419814492152 | 0.5666170857049693 |
| 0.4741914467343378 | 0.3074698550191215 | 0.5519584562530895 |
| 0.5153154082834988 | 0.5932779343132424 | 0.6153648213088232 |
| 0.3253044525470585 | 0.0952732606822835 | 0.7454401616387045 |
| 0.3988219589314355 | 0.2502326100162051 | 0.8130799003989253 |
| 0.8179699377409477 | 0.5890814832315456 | 0.2332742414389415 |
| 0.8769004079795266 | 0.7493739926934708 | 0.3294457122151044 |
| 0.6837033056210444 | 0.9072391723938011 | 0.7569465508329500 |
| 0.6337735291106910 | 0.7390571547615536 | 0.8349676254115934 |
| 0.1613084007902259 | 0.4133534565383599 | 0.2670840178763925 |
| 0.1025305977337680 | 0.2475237860381228 | 0.3193937326708607 |
| 0.6858698565860735 | 0.0929782578970775 | 0.2698059424504393 |
| 0.6238796928659909 | 0.2522855338476901 | 0.1820630897649309 |
| 0.1880069424434367 | 0.5916658562710495 | 0.7606743681343886 |
| 0.1051055610622882 | 0.7328352881088520 | 0.6704950542105692 |
| 0.3140411184616170 | 0.9158083038527067 | 0.2113132688036288 |

|                    |                     |                     |                     |                    |                    |
|--------------------|---------------------|---------------------|---------------------|--------------------|--------------------|
| 0.3208595002338868 | 0.8062364226941199  | 0.6986776565879396  | 0.6038835238907510  | 0.5985485157169066 | 0.0157436464970644 |
| 0.8348981703641130 | 0.2974461228310474  | 0.2188349926210265  | 0.6712722751768112  | 0.7763770520268949 | 0.4999747395736236 |
| 0.6716444119420686 | 0.2019456578258101  | 0.7213590066412578  | 0.8976534130262621  | 0.9164308222829050 | 0.5333775570062329 |
| 0.1827443167774661 | 0.7071356690617847  | 0.1975918632562141  | 0.1659822746204540  | 0.2844216810542832 | 0.0147815702290544 |
| 0.0826758579227800 | 0.1973497208206680  | 0.5068210369786854  | 0.3936086122855471  | 0.4140856381334430 | 0.9846204297207350 |
| 0.5883804702397839 | 0.6964935301542283  | 0.9994465147515541  | 0.6506978466348556  | 0.2086834410071887 | 0.5103202391765080 |
| 0.9176177412684225 | 0.7928399393229668  | 0.5000909438969003  | 0.9043122373718617  | 0.0992452918239835 | 0.4959619069594723 |
| 0.4164994328564404 | 0.29656442357602363 | 0.0132874773029528  | 0.1445934519258003  | 0.7119730216911009 | 0.0005927496245590 |
| 0.9180600472818057 | 0.1954028452293670  | 0.5133166011785661  | 0.4032633187678769  | 0.5951267565537393 | 0.0400297823565978 |
| 0.0846107509434404 | 0.7946061390485397  | 0.4965594488983456  | 0.3254294693908761  | 0.7786627565149260 | 0.4906935103156655 |
| 0.5841105665860766 | 0.2971743514425000  | 0.01266820369785937 | 0.1077235230879978  | 0.9179601148011258 | 0.5307287671465701 |
| 0.2715656103088762 | 0.0084873801419789  | 0.7933226543626972  | 0.8363092026757712  | 0.2779272347044710 | 0.0157624945094241 |
| 0.7790502585692352 | 0.4935758766393903  | 0.2930828568931005  | 0.6120176256542891  | 0.4152864725653629 | 0.9909499311015111 |
| 0.7275979045165997 | 0.0018369130076579  | 0.7981286480730319  | 0.2633496990278488  | 0.2578965577354850 | 0.7699642079644562 |
| 0.2185697741120407 | 0.4984789736846480  | 0.2854346218919730  | 0.7724286048423679  | 0.7642172335713866 | 0.7407158735413475 |
| 0.7300143357222311 | 0.0000208839234475  | 0.2131500682220704  | 0.7568311896220123  | 0.2543037328769273 | 0.3030322014751832 |
| 0.2304833073605650 | 0.4993960692400066  | 0.6992654721809259  | 0.2578582470540951  | 0.7582991229678626 | 0.1849940054760566 |
| 0.2624265066006615 | 0.0039786246673188  | 0.1991952909009553  | 0.7467219953105442  | 0.7513660830656903 | 0.2038163489645726 |
| 0.7732544081946386 | 0.4976065514833365  | 0.7071262524624089  | 0.2482704610427575  | 0.2669967706609313 | 0.3004101464613385 |
| 0.1492240233716728 | 0.9970572775289241  | 0.4973022484156431  | 0.2352552148319873  | 0.7667958142166356 | 0.7540655653687054 |
| 0.6574059197538134 | 0.4932537837699797  | 0.0045519775402880  | 0.7413424139215579  | 0.2620332741573321 | 0.7606618790107547 |
| 0.8495499819824559 | 0.9961364209195338  | 0.5079906605190203  | 0.0022190260426171  | 0.2298665016491483 | 0.5447660347123389 |
| 0.3427653332866569 | 0.4951852850205185  | 0.0008864388689531  | 0.5089228491586084  | 0.7295303478386970 | 0.9379216186572137 |
|                    |                     |                     | 0.0031070397379764  | 0.8036418256676328 | 0.4499850695151864 |
|                    |                     |                     | 0.5027784647412830  | 0.3043503500895852 | 0.0448355116288042 |
|                    |                     |                     | 0.2077368611943484  | 0.0256902602463498 | 0.6668069557291716 |
|                    |                     |                     | 0.7023249216798462  | 0.5076087532851687 | 0.1938368927896761 |
|                    |                     |                     | 0.8020838085549826  | 0.0247486152507861 | 0.6849101114935152 |
|                    |                     |                     | 0.2969097179217499  | 0.4981926492451905 | 0.1773688810606302 |
|                    |                     |                     | 0.8033722464033417  | 0.0036103905512377 | 0.3319210646970703 |
|                    |                     |                     | 0.3030044026558372  | 0.5264814918954457 | 0.8266192452975289 |
|                    |                     |                     | 0.1933482628906233  | 0.0106361198821716 | 0.3133447836763850 |
|                    |                     |                     | 0.7094051468642988  | 0.5223407396244113 | 0.8395829241707915 |
|                    |                     |                     | 0.2496050518308692  | 0.9986713896936052 | 0.9961695319968698 |
|                    |                     |                     | 0.7561654898661914  | 0.5008068089640574 | 0.5134966816794773 |
|                    |                     |                     | 0.7535038638908205  | 0.9940732531627461 | 0.0064675390334159 |
|                    |                     |                     | 0.2527607652415895  | 0.5007383566390153 | 0.5059166936239450 |
|                    |                     |                     | 0.4179336067954651  | 0.7132880818988880 | 0.0007187740022232 |
|                    |                     |                     | 0.3359026758864587  | 0.2038274011082493 | 0.7195860067132713 |
|                    |                     |                     | 0.8260624015650606  | 0.7074952123263003 | 0.2049276652708656 |
|                    |                     |                     | 0.6933488653724780  | 0.8013328305597724 | 0.7036628763921371 |
|                    |                     |                     | 0.1743167418857610  | 0.3086529521144996 | 0.2240049891206439 |
|                    |                     |                     | 0.6796146010231610  | 0.2053474534594173 | 0.3084369102921301 |
|                    |                     |                     | 0.1651738848853199  | 0.7057741788164620 | 0.792124600083357  |
|                    |                     |                     | 0.3252855469259543  | 0.8088594147244947 | 0.2828113681849231 |
|                    |                     |                     | 0.8194049951844633  | 0.3010556376405589 | 0.8092620102231791 |
|                    |                     |                     | 0.6778733802820369  | 0.8011043371326139 | 0.2902738998881276 |
|                    |                     |                     | 0.1868100134755224  | 0.3037855769074298 | 0.8095484971888283 |
|                    |                     |                     | 0.3228284320677588  | 0.2112523680315448 | 0.3064837623276020 |
|                    |                     |                     | 0.8427934904897967  | 0.7056576432704134 | 0.7953843864245584 |
|                    |                     |                     | 0.3140449293257461  | 0.8009465135072986 | 0.7005995904657070 |
|                    |                     |                     | 0.8276213461419957  | 0.3029718769682717 | 0.2243301385420224 |
|                    |                     |                     | 0.6693484844516817  | 0.2042749668856629 | 0.7201222787593053 |
|                    |                     |                     | 0.1800668926141782  | 0.7111370118684022 | 0.1969088638098171 |
|                    |                     |                     | 0.0855200554545874  | 0.2124541132276150 | 0.5152520815049328 |
|                    |                     |                     | 0.59033646462043544 | 0.7103235679139958 | 0.9969109531875517 |
|                    |                     |                     | 0.9210963163329637  | 0.8084848095691299 | 0.5031864070587773 |
|                    |                     |                     | 0.4186263928543923  | 0.3072454654944821 | 0.0100132510425226 |
|                    |                     |                     | 0.9193862655187885  | 0.2107580593644229 | 0.5149527988326525 |
|                    |                     |                     | 0.0863294885843544  | 0.8095835892251131 | 0.4972714599086316 |
|                    |                     |                     | 0.5863923416397370  | 0.3075704727637927 | 0.0112591975767700 |
|                    |                     |                     | 0.2760492059913560  | 0.0071137147383453 | 0.7922087362795978 |
|                    |                     |                     | 0.7759986200354874  | 0.5057302281661435 | 0.3046618287663492 |
|                    |                     |                     | 0.7312279156541166  | 0.0071137364043494 | 0.7999112991592057 |
|                    |                     |                     | 0.2273470036992862  | 0.5067009344908584 | 0.2999487909891556 |
|                    |                     |                     | 0.7316094737765297  | 0.0027415456474387 | 0.2138178831284350 |
|                    |                     |                     | 0.2308731126314569  | 0.5097256082923280 | 0.7133531312449790 |
|                    |                     |                     | 0.2676997238577101  | 0.0087552867480341 | 0.2059759735916700 |
|                    |                     |                     | 0.7797626573944072  | 0.5077129166632588 | 0.7202157135697149 |
|                    |                     |                     | 0.1526591106919639  | 0.0128539921216628 | 0.5031979196455936 |
|                    |                     |                     | 0.6575189228142406  | 0.5101913808349110 | 0.0093143502624571 |
|                    |                     |                     | 0.8516514857139441  | 0.0106900941339774 | 0.5108939592861930 |

P4(H7C3O74Al1Si35):

|                    |                    |                    |
|--------------------|--------------------|--------------------|
| 0.5072156504714798 | 0.7450265366120092 | 0.7489970382533997 |
| 0.5443719548935562 | 0.8840653297929393 | 0.5593663240956701 |
| 0.4515411885341010 | 0.8745605895357542 | 0.6041031631583564 |
| 0.4860172750482477 | 0.8350575292151277 | 0.3944411810176476 |
| 0.3970377756853622 | 0.5823908504340264 | 0.5732902499729278 |
| 0.4809322567260352 | 0.6955540348272322 | 0.5521553608558847 |
| 0.4345860395184005 | 0.5944371029843651 | 0.3444338826660527 |
| 0.4965667909803315 | 0.8429818762187224 | 0.5363499122357993 |
| 0.4432779716048216 | 0.5857350315532344 | 0.4872150169779417 |
| 0.4948171506404719 | 0.5279166873783581 | 0.5348061914943116 |
| 0.5101097180316785 | 0.7496739813990061 | 0.6072845765052293 |
| 0.5426139515103543 | 0.4823514619331419 | 0.5795651284218124 |
| 0.3304418930533330 | 0.0942991565680202 | 0.7735669398217695 |
| 0.4014211602613145 | 0.2493016923915121 | 0.8288385531914315 |
| 0.8225221448275875 | 0.5984694623001729 | 0.2637766195219768 |
| 0.8750937201996294 | 0.7651012869388794 | 0.3411229930854489 |
| 0.6898373164080880 | 0.9142109738001167 | 0.7296855162151701 |
| 0.6390237708704021 | 0.7520954667379414 | 0.8386585569211036 |
| 0.1732522308834916 | 0.4212436005391993 | 0.2552731821822576 |
| 0.1090541068034412 | 0.2616312335002107 | 0.3300383265556803 |
| 0.6855948743537041 | 0.0968622013501275 | 0.2452183360054576 |
| 0.6253488198752777 | 0.2604893711719072 | 0.1810742925611066 |
| 0.1769491357604949 | 0.5967360881399628 | 0.7385573076300886 |
| 0.1004140364114292 | 0.7482888112399451 | 0.6754694831136092 |
| 0.3160871181067506 | 0.9222828140998729 | 0.2723244557791205 |
| 0.3976889253435019 | 0.7775898747084895 | 0.1902023485121092 |
| 0.8212844076852548 | 0.4135426282265229 | 0.7791670374362738 |
| 0.8778549676928264 | 0.2514061814683402 | 0.6863696336012666 |
| 0.6823749831659711 | 0.9139559215048578 | 0.2675698437423577 |
| 0.6081980222473575 | 0.7617717887276072 | 0.1862117530271590 |
| 0.1902136618860624 | 0.4157485302106565 | 0.7768473908824305 |
| 0.1274452283796066 | 0.2574073668496411 | 0.6827474486535081 |
| 0.3119671955670000 | 0.1042352916635636 | 0.2410028730999088 |
| 0.3804206890753790 | 0.2613168076120331 | 0.1810757619984997 |
| 0.8328600019947245 | 0.5957359488879845 | 0.7466487423213692 |
| 0.9083729541335188 | 0.7490508171545542 | 0.6850301942610955 |
| 0.3180833659356779 | 0.9140990552716630 | 0.7312332043144920 |
| 0.3748685951151103 | 0.7499950493550074 | 0.8101783479594928 |
| 0.8229223294838306 | 0.4156910196129004 | 0.2484712248347378 |
| 0.8950026558101314 | 0.2634257076589464 | 0.3332745228704113 |
| 0.6781231834062851 | 0.0954391367910858 | 0.7794260795111470 |
| 0.6048583345345335 | 0.2503508504292640 | 0.8303419806232029 |
| 0.1857020800141456 | 0.6039869273577949 | 0.2665358289455639 |
| 0.1303652073825248 | 0.7698392827954024 | 0.3302074109564899 |
| 0.3517867226459757 | 0.2130109685946664 | 0.5091876004748883 |
| 0.0987836377917333 | 0.1006140860748630 | 0.5047186580789429 |
| 0.8579388106950248 | 0.7159012127729767 | 0.0063798829766029 |

0.3495400010319187 0.5106442025854108 0.0083294602972472

P5(H13C4O74Al1Si35):

0.5118302822446594 0.6540605794698706 0.7069120989418565  
0.5048735201026773 0.6059785710761574 0.3390071080834431  
0.4873877935749604 0.7195393261382748 0.4261718881847258  
0.4295466663487062 0.6250000282734476 0.4758931586492849  
0.5126148233734469 0.4647834095331120 0.5769856718418040  
0.5434177780611975 0.3483978548374154 0.5442624719777811  
0.5015223653204828 0.4100859046098719 0.3660130592334596  
0.4502090315803713 0.3720689750738586 0.5510558095866145  
0.4888424301112479 0.2228902751402657 0.3964979372717607  
0.4811031104431507 0.1617789787098189 0.6214750021668607  
0.4279906280083381 0.9622165904077278 0.4280374144189096  
0.5225453683025592 0.9525095197468616 0.4481106480493722  
0.4718140058314404 0.0051485082336882 0.6271145919640873  
0.4851050315778380 0.6442622070778725 0.4548193601148185  
0.5018429513856475 0.3983962519102988 0.5095974402904844  
0.4830964750577493 0.1597400750187035 0.4761602427502822  
0.4759663363724371 0.9933345366914708 0.4839480194138019  
0.3248337230098883 0.0816008516983118 0.749956553716039  
0.3991545666217391 0.2301028213375886 0.8298626489433900  
0.8150478524114604 0.5977513740526632 0.2272638381765688  
0.8727145612191194 0.7579168148750952 0.3278831555142858  
0.6827052952304200 0.9147836699757050 0.7496733792447330  
0.6358344110453515 0.7474404104156847 0.8384055602913065  
0.1696032153461715 0.4135165269642727 0.2483889291931263  
0.1071614983652012 0.2532299581357336 0.3326758533646981  
0.6838541228738180 0.10078273734259479 0.2607198893129095  
0.6236573310349911 0.2609982397456250 0.1761330810826180  
0.1695704878502653 0.5837186324031904 0.7242077478718727  
0.0974627731014408 0.7396202487127965 0.6718731142835566  
0.3196213154703074 0.9181805366701141 0.2645863503344827  
0.3924466617436835 0.7688039214463913 0.1701914694557374  
0.8202638945034550 0.4145416858745108 0.7498963011068724  
0.8742759210218836 0.2485062277564225 0.6745341315412503  
0.6751706979267382 0.9191254379109708 0.2498407076400895  
0.6012201980181118 0.7668552862822011 0.1769080108503616  
0.1811827579348702 0.4021496396534090 0.7665001921111667  
0.1257708840450888 0.2373062552948468 0.6862881751411010  
0.3103700225111368 0.0986336381317443 0.2396463794535038  
0.3778373999515239 0.2555301319890901 0.1790954740843773  
0.8218803271158421 0.5973105100417868 0.7551854134431863  
0.8999076250614024 0.745575633373174 0.6771252301159834  
0.3133416486817993 0.9011450935366909 0.7300188715879159  
0.3735256019781872 0.7368807002300954 0.7963523604595579  
0.8322084546520259 0.4165936418953251 0.2657336659401395  
0.8969158319682577 0.2556243671018592 0.3236472399330310  
0.6774774428664827 0.0967206055584171 0.7509630530998663  
0.6034849568809477 0.2481970921553511 0.8248069031939878  
0.1946954149010693 0.5953775044533387 0.2543428685776732  
0.1236624608610342 0.7493287740682320 0.3230149170425136  
0.3535574715554688 0.2062686696561471 0.5054578765269113  
0.0953584296790666 0.0878815160238418 0.4918602549433047  
0.8389935723309847 0.7316215009932066 0.9925423993674869  
0.6142868800336956 0.5982826495592661 0.0350340057801333  
0.6514760434328011 0.7941887859123682 0.4987152438733347  
0.8967223874845445 0.9109653938425168 0.5173910453437855  
0.1660379414390434 0.2723276137141042 0.0158103838811670  
0.3904239997420973 0.4012079545032066 0.9611764272336671  
0.6559851549132745 0.2259560889181529 0.5067388308415914  
0.8999487694502122 0.0936118433268192 0.4932115685008540  
0.1439111764571948 0.6982851792646301 0.9917923243944529  
0.3958899583940294 0.5829578915417670 0.0314595220741296  
0.3231383130781538 0.7733202020428109 0.4780429753465469  
0.1043975569044520 0.9045581564239740 0.5091183960686365  
0.8456052785050048 0.215290395834660 0.0064567657548338  
0.6007523175470837 0.4151457535213581 0.9855325898573213  
0.2614233284517127 0.2499086016290022 0.7651792828472708  
0.7631706196202046 0.7647728641555531 0.6997590163579872  
0.7588174294601089 0.2581941663858842 0.2767584448628426

0.2509343846177501 0.7624439070121483 0.1783144482861871  
0.7389139179282438 0.7533592763053960 0.2311785736415359  
0.2455558510329681 0.2606436208330436 0.3071935164401367  
0.2337455625729348 0.7504653666396379 0.7391350926333047  
0.7416538156692525 0.2623489077649594 0.7819419347183754  
0.0004273416844995 0.2191517960878855 0.5460573986148276  
0.5062755508615808 0.7073378949608013 0.9415360522738894  
0.9988028107975282 0.7907457315269539 0.4465923167546819  
0.4997036408370974 0.2903829647184466 0.0402140444269179  
0.2003562349382548 0.0100904037034795 0.6671542425570394  
0.7071489490383911 0.4806843195181401 0.1702994325123797  
0.8000796288990699 0.0132031747576775 0.6815997737939696  
0.2985449721270541 0.4738002295461925 0.1798199196253876  
0.7991593374824433 0.9985880551812087 0.3281549692874179  
0.2919581996840677 0.5117136299628129 0.8336895337301371  
0.1941402453530401 0.0010373974963684 0.311329832599120  
0.7012166933915935 0.5071792988091488 0.8187873499539435  
0.2486367956425184 0.9944411609682717 0.9925170525349571  
0.7533110563183101 0.5094812374960114 0.4964944827026585  
0.7497076327641850 0.0092995674282292 0.0041044980372504  
0.2494143084494524 0.4856642600494752 0.5040640796761053  
0.5285070299906209 0.6196523998526260 0.6023050797687546  
0.4839098896920646 0.0834056674091812 0.3918001956526496  
0.4160471357858526 0.6994983837032009 0.9884023233173806  
0.3317412038571277 0.1926939659867699 0.7153190455515812  
0.8165070855912901 0.7100153603823642 0.1957990140575916  
0.6826424228561123 0.8037337933612250 0.6986372974056891  
0.1714493941057000 0.3007865155368918 0.2241691871952654  
0.6818522270905092 0.2120809751215020 0.3025433382106399  
0.1625367317516933 0.6931268335024846 0.7820446229100071  
0.3234496224948415 0.8025755585532224 0.2706034189871218  
0.8210495318645954 0.3047185565994326 0.8020341749057280  
0.6673454249274826 0.8071931579639724 0.2889784747883013  
0.1829083270723189 0.2914377772885999 0.8078498054179448  
0.3197619145229922 0.2057688689814867 0.3034394411947758  
0.8306415360620250 0.7093017967502320 0.7826412883035161  
0.3126542915524411 0.7876285168866204 0.6900376178811172  
0.8331759405642671 0.3059663915271926 0.2171408634337695  
0.6713152916998695 0.2084392998075941 0.7164952849747337  
0.1790716752759423 0.7013913617025480 0.1882444382970618  
0.0831528758191311 0.1995031980029935 0.5132948056958355  
0.5870583398459601 0.7048265591668326 0.9968624390281207  
0.9166082047736239 0.8012213307411784 0.4931775818264654  
0.4157482776709926 0.2968687767385916 0.0023150716497398  
0.9174815255391024 0.2042070292614184 0.5092764071337683  
0.0822843702218279 0.7954523995463205 0.4881739934601725  
0.5830340005118728 0.3053376111536394 0.0057525148407009  
0.2709935538771759 0.9940056294130315 0.7851843116418209  
0.7765503050308951 0.5023635600529914 0.2901895322812393  
0.7280677526510715 0.0075506197700577 0.7959730912051839  
0.2285015586394579 0.4940769904599591 0.2956807822110008  
0.7274907718370969 0.0063056504328216 0.2113181035845599  
0.2237757176132220 0.4964391568856428 0.7082719210912742  
0.2676029297258609 0.0013881538085769 0.2018289929268278  
0.7737273172384391 0.5073313843252265 0.7055645419880676  
0.1491189106978936 0.9997870054019700 0.4947415766916592  
0.6557935657768539 0.5021405547768438 0.0012265175747928  
0.8486642313322719 0.0035915178768988 0.5049392795082497  
0.3452569789277078 0.4966878346665453 0.0024637235429452

P6 (H11C3O74Al1Si35):

0.5148779035936997 0.6315935483643500 0.7232442169472861  
0.5109805213130301 0.6129266749103763 0.3463062493249254  
0.5069913407000470 0.7209602890785902 0.4641120419685905  
0.4361150088704520 0.6398287373115608 0.4800254523252718  
0.4739101213251615 0.4615413742271812 0.5750214091915140  
0.4510159658074144 0.4301603086540311 0.3510021296828825  
0.3835463850979082 0.4606788634428298 0.5047478269548407  
0.5433708344141408 0.2155122411885273 0.6916646667452326  
0.4261444697575030 0.3534567113765164 0.5317072073552112  
0.4754210449238698 0.2437134380291184 0.3509535688540950  
0.5446287842582791 0.3181061730421604 0.4719386750254202

|                    |                    |                    |                     |                    |                    |
|--------------------|--------------------|--------------------|---------------------|--------------------|--------------------|
| 0.4937695247467673 | 0.6462777298648348 | 0.4699526437791235 | 0.7546292256624980  | 0.5037595736059188 | 0.4907901585966528 |
| 0.4349681519704731 | 0.4266060033115906 | 0.4901383773047243 | 0.7526464983984624  | 0.0087575659589731 | 0.0033262088455288 |
| 0.5090319750443157 | 0.2580664654895557 | 0.4660037476675285 | 0.2468758720795634  | 0.4987271203661265 | 0.4889923109876548 |
| 0.3254669973645505 | 0.0833421703748982 | 0.7424329059750505 | 0.5291737262517415  | 0.6001478177868549 | 0.6129600252770615 |
| 0.3957465266273203 | 0.2371358504641705 | 0.8207727327177068 | 0.5081505166966949  | 0.1987309099241585 | 0.5894614422758906 |
| 0.8177443653153347 | 0.5883040497088246 | 0.2200393837623054 | 0.4168292665584588  | 0.6943944852801920 | 0.9914084522043112 |
| 0.8767347818934326 | 0.7465859122444982 | 0.3274522042924985 | 0.3275012011696248  | 0.1950983608224988 | 0.7140106821111587 |
| 0.6840191045502095 | 0.9100912498921687 | 0.7563612957400565 | 0.8184459989327948  | 0.7014659250011874 | 0.1976057313061617 |
| 0.6345448049258096 | 0.7421976344062315 | 0.8359655841926070 | 0.6822337532494345  | 0.7996324745998393 | 0.6997336958122702 |
| 0.1632383878896064 | 0.4064754127609334 | 0.2656667559877803 | 0.1661915594632575  | 0.2969538768473043 | 0.2098374983037488 |
| 0.1066405575555720 | 0.2398978415752708 | 0.3192125693728443 | 0.6864386139419807  | 0.2032319957889541 | 0.2959050031113577 |
| 0.6876185542878801 | 0.0911191357156795 | 0.2713898029145838 | 0.1742037284335183  | 0.6936021121133606 | 0.7786383912152672 |
| 0.6239175876894620 | 0.2468220669546284 | 0.1718403041245438 | 0.3306454398342638  | 0.8017466713352803 | 0.2752188871632697 |
| 0.1825123453624116 | 0.5806374373889795 | 0.7621782868642342 | 0.8253749592364699  | 0.3001189707194101 | 0.7970670221412348 |
| 0.1048420001527788 | 0.7256376234121262 | 0.6654995509914343 | 0.6691325962487085  | 0.7991128927011744 | 0.2890470858458158 |
| 0.3126486658043532 | 0.9084409121924111 | 0.2098171988716899 | 0.1790857945156645  | 0.2907166875640073 | 0.7985423036318124 |
| 0.3985894585481802 | 0.7628331553032552 | 0.1767335230355869 | 0.3155603284663542  | 0.1987550012527279 | 0.2998420399300628 |
| 0.8250280679160298 | 0.4085339021538132 | 0.7362604437058025 | 0.8292962135797382  | 0.7031121008804249 | 0.7842597147106929 |
| 0.8720610600078089 | 0.2378451114576308 | 0.6642159230337015 | 0.3198937694272601  | 0.7957775513542131 | 0.6933231720470516 |
| 0.6787543878454159 | 0.9091587802641143 | 0.2361842350397367 | 0.8372933615483973  | 0.2985270320679518 | 0.2078445571067604 |
| 0.6044756828987374 | 0.7550164202949929 | 0.1773475040746604 | 0.6785765391169321  | 0.2041826175939363 | 0.7122351300827674 |
| 0.1809120366359735 | 0.3984128893414223 | 0.7335263711658371 | 0.1826645989903994  | 0.6998375050477037 | 0.1921193647980175 |
| 0.1280279253891976 | 0.2306349452482479 | 0.6703145982006191 | 0.0833131671807266  | 0.1904858572465997 | 0.5039883366120606 |
| 0.3048543117561309 | 0.0880887257815814 | 0.2716880636770540 | 0.5890487755130067  | 0.6949677321906407 | 0.9961498707604761 |
| 0.3815888162409564 | 0.2347252550466479 | 0.1780944300776497 | 0.9192138252972910  | 0.7902000793678496 | 0.4952546253695687 |
| 0.8184747931354579 | 0.5911140572805706 | 0.7594194361646274 | 0.4150604469102888  | 0.2884716556336997 | 0.0072993137882662 |
| 0.8992825100988924 | 0.7360194074847328 | 0.6786927829849532 | 0.9187089875605849  | 0.1941691212035650 | 0.5034277065162200 |
| 0.3106279714692803 | 0.9016293779594733 | 0.7746976851942264 | 0.0854426701856141  | 0.7877527793446575 | 0.4916763084556379 |
| 0.3764237489123019 | 0.7377596995752782 | 0.8016907723453031 | 0.5839427010280929  | 0.2954121655102711 | 0.0044604563863970 |
| 0.8351087677487996 | 0.4073808354696666 | 0.2686239748217361 | 0.26699046367038846 | 0.9994297731850921 | 0.7893317310365191 |
| 0.8979962232274588 | 0.2438751723760646 | 0.3162882186818834 | 0.7794319010946680  | 0.4936744244238298 | 0.2859838919994573 |
| 0.6838091595833262 | 0.0931069687358104 | 0.7431883533758139 | 0.7315752111890532  | 0.0014558468040278 | 0.7952130403287825 |
| 0.6051214723891434 | 0.2414770913522730 | 0.8130362306148768 | 0.2190349068065274  | 0.4931430813421471 | 0.2848362680202143 |
| 0.1776855853675556 | 0.5880116557399830 | 0.2315392006524277 | 0.7306025146369421  | 0.9974665760581587 | 0.2099289741537760 |
| 0.1249832444040280 | 0.7529614261781177 | 0.3140404799529861 | 0.2286450937507780  | 0.4914906295377932 | 0.6989305123755258 |
| 0.3384681115494601 | 0.2189973431845900 | 0.5049449364303129 | 0.2618122994039780  | 0.9975012990746137 | 0.1946340077915210 |
| 0.0933488534256242 | 0.0784604507339566 | 0.4879431794146356 | 0.7749059448492659  | 0.4992169353677554 | 0.6997660804311129 |
| 0.8378253039998285 | 0.7264209637377874 | 0.9936790428779148 | 0.1480976657471231  | 0.9910836112463741 | 0.4934950671339138 |
| 0.6205104362424905 | 0.5892536931928873 | 0.0275030855280605 | 0.6589405982513554  | 0.4911902427963923 | 0.9968334605433995 |
| 0.6519182253827793 | 0.7926311613314425 | 0.4990271000368267 | 0.8517992730800614  | 0.9926801194982531 | 0.5029261551160786 |
| 0.8999109024063259 | 0.9004263848583136 | 0.5160705441068885 | 0.3432887827462920  | 0.4888292196629465 | 0.9991672620045762 |
| 0.1500226650653147 | 0.2843513188654825 | 0.9998990091791029 |                     |                    |                    |
| 0.3952620414395156 | 0.3968237737134146 | 0.0056667158762735 |                     |                    |                    |
| 0.6663476307180431 | 0.2271489199317429 | 0.5027171565071527 |                     |                    |                    |
| 0.9024714943597871 | 0.0832729200520959 | 0.4894831574149734 |                     |                    |                    |
| 0.1623839290460225 | 0.7196129494127348 | 0.9859132535305690 |                     |                    |                    |
| 0.3886857649114432 | 0.5798868878038590 | 0.0267565823628715 |                     |                    |                    |
| 0.3425841517398993 | 0.8067880665239855 | 0.4877929337293310 |                     |                    |                    |
| 0.1032310890307002 | 0.8971471675603908 | 0.5284680182908303 |                     |                    |                    |
| 0.8544420662964782 | 0.2903825436337115 | 0.9979963604751632 |                     |                    |                    |
| 0.6020807766492169 | 0.4048687852255028 | 0.9887508215188276 |                     |                    |                    |
| 0.2580468898937198 | 0.2459412322514964 | 0.7927809213091166 |                     |                    |                    |
| 0.7626628047945019 | 0.7597544650983750 | 0.7008293316049716 |                     |                    |                    |
| 0.7610315369457510 | 0.2498567211571512 | 0.2479005589430727 |                     |                    |                    |
| 0.2612754115312441 | 0.7363502659622796 | 0.2339020307907376 |                     |                    |                    |
| 0.7413498333816335 | 0.7429132473448234 | 0.2441558328607201 |                     |                    |                    |
| 0.2445973142118874 | 0.2561138887936281 | 0.2542443516038730 |                     |                    |                    |
| 0.2415216673818321 | 0.7468090980817905 | 0.6958749148920944 |                     |                    |                    |
| 0.7437649479662340 | 0.2612412134529833 | 0.7958383275372611 |                     |                    |                    |
| 0.0008643130545209 | 0.2125153044994548 | 0.5424924734639518 |                     |                    |                    |
| 0.5078477350663348 | 0.6901293716862682 | 0.9475965347600166 |                     |                    |                    |
| 0.0015861163187552 | 0.7778176468564908 | 0.4566658846466254 |                     |                    |                    |
| 0.5008764402695931 | 0.2777406573179491 | 0.0298403911541811 |                     |                    |                    |
| 0.2034359836927067 | 0.0079454501182141 | 0.6543889670486820 |                     |                    |                    |
| 0.7108666686673502 | 0.4689276103821598 | 0.1643793826388560 |                     |                    |                    |
| 0.8033899313013961 | 0.0027977947505278 | 0.6801047312346995 |                     |                    |                    |
| 0.2854572679012222 | 0.4727753597600994 | 0.1566125740484026 |                     |                    |                    |
| 0.8020368234397424 | 0.9867261376918322 | 0.3265739321554335 |                     |                    |                    |
| 0.3026894951608625 | 0.4841457372142415 | 0.8065269258058407 |                     |                    |                    |
| 0.1887966709779079 | 0.9842502749452890 | 0.3045565055030153 |                     |                    |                    |
| 0.7021531974533417 | 0.4893928028212002 | 0.8109675508199601 |                     |                    |                    |
| 0.2405466217313972 | 0.0169745327843742 | 0.9890754208584482 |                     |                    |                    |
